# Supplementary material for: Genome-wide siRNA Screening at Biosafety Level 4 Reveals a Crucial Role for Fibrillarin in Henipavirus Infection
Source: PLoS Pathog. 2016 Mar 24;12(3):e1005478. doi: 10.1371/journal.ppat.1005478 (PMC4806981; doi:10.1371/journal.ppat.1005478)
Supplement: S1 Table — (XLSX) [file ppat.1005478.s001.xlsx]

## Sheet: S1
Supplementary table S1
Host genes required for Hendra virus infection
entrez.gene.ID	entrez.gene.name	description	gene.name.alias	Dharmacon.reagent.ID	average.luciferase.normalised.to.mock	average.luciferase.normalised.to.mock.robust.z.scored	relative.cell.viability.normalized.to.mock
55692	LUC7L	LUC7-like (S. cerevisiae)	LUC7L;FLJ10231;LUC7-LIKE;LUC7B1;Luc7;SR+89;hLuc7B1	M-015452-00	0.05	-3.11	0.795
55335	NIPSNAP3B	nipsnap homolog 3B (C. elegans)	NIPSNAP3B;FLJ11275;NIPSNAP3	M-015435-00	0.06	-3.07	0.655
23363	OBSL1	obscurin-like 1	OBSL1;KIAA0657;MGC71026	M-023133-01	0.06	-3.07	0.59
5950	RBP4	retinol binding protein 4, plasma	RBP4	M-008289-01	0.07	-3.04	0.76
6130	RPL7A	ribosomal protein L7a	RPL7A;L7A;SURF3;TRUP	M-011134-00	0.07	-3.04	0.58
55753	OGDHL	oxoglutarate dehydrogenase-like	OGDHL	M-009703-00	0.08	-3	0.66
23064	SETX	senataxin	SETX;ALS4;AOA2;DKFZp781B151;FLJ12840;FLJ43459;KIAA0625;SCAR1;bA479K20.2	M-021420-01	0.08	-3	0.915
2091	FBL	fibrillarin	FBL;FIB;FLRN;RNU3IP1	M-011269-00	0.08	-3	0.64
127281	C1orf93	chromosome 1 open reading frame 93	C1orf93;DKFZp547M123;MGC26818	M-015867-01	0.09	-2.96	0.645
5425	POLD2	polymerase (DNA directed), delta 2, regulatory subunit 50kDa	POLD2	M-020131-01	0.1	-2.92	0.615
122416	ANKRD9	ankyrin repeat domain 9	ANKRD9;MGC21990	M-015551-01	0.1	-2.92	0.635
57461	ISY1	ISY1 splicing factor homolog (S. cerevisiae)	ISY1;FSAP33;KIAA1160	M-013894-01	0.1	-2.92	0.625
55028	C17orf80	chromosome 17 open reading frame 80	C17orf80;FLJ20721;HLC-8;MIG3	M-016959-01	0.1	-2.92	0.805
6157	RPL27A	ribosomal protein L27a	RPL27A;FLJ43464;L27A;MGC10850;MGC17878;MGC87238	M-011159-01	0.1	-2.92	1.08
23499	MACF1	microtubule-actin crosslinking factor 1	MACF1;ABP620;ACF7;FLJ45612;FLJ46776;KIAA0465;KIAA1251;MACF;OFC4	M-013618-00	0.1	-2.92	0.505
6143	RPL19	ribosomal protein L19	RPL19;DKFZp779D216;FLJ27452;L19;MGC71997	M-010865-01	0.1	-2.92	0.61
3838	KPNA2	karyopherin alpha 2 (RAG cohort 1, importin alpha 1)	KPNA2;IPOA1;QIP2;RCH1;SRP1alpha	M-004702-02	0.11	-2.89	0.815
25949	SYF2	SYF2 homolog, RNA splicing factor (S. cerevisiae)	SYF2;CBPIN;DKFZp564O2082;NTC31;P29;fSAP29	M-020239-01	0.11	-2.89	0.575
84337	ELOF1	elongation factor 1 homolog (S. cerevisiae)	ELOF1;ELF1	M-014888-01	0.11	-2.89	0.86
286122	C8orf31	chromosome 8 open reading frame 31	C8orf31;FLJ37131;MGC90155	M-018064-01	0.11	-2.89	0.99
8896	BUD31	BUD31 homolog (S. cerevisiae)	BUD31;EDG-2;EDG2;G10;MGC111202;YCR063W;fSAP17	M-018665-00	0.11	-2.89	0.785
147694	ZNF548	zinc finger protein 548	ZNF548;FLJ32932	M-016400-00	0.11	-2.89	1.075
57680	CHD8	chromodomain helicase DNA binding protein 8	CHD8;DKFZp686N17164;HELSNF1;KIAA1564	M-030271-02	0.12	-2.85	0.88
121340	SP7	Sp7 transcription factor	SP7;MGC126598;OI11;OSX;osterix	M-015429-01	0.12	-2.85	0.6
54938	SARS2	seryl-tRNA synthetase 2, mitochondrial	SARS2;FLJ20450;SARS;SARSM;SERS;SYS;SerRS;SerRSmt;mtSerRS	M-016311-00	0.12	-2.85	0.65
5822	PWP2	PWP2 periodic tryptophan protein homolog (yeast)	PWP2;EHOC-17;PWP2H;UTP1	M-019927-00	0.12	-2.85	0.965
84954	MPND	MPN domain containing	MPND;FLJ14981	M-018630-01	0.12	-2.85	0.7
66035	SLC2A11	solute carrier family 2 (facilitated glucose transporter), member 11	SLC2A11;GLUT10;GLUT11;MGC118830;MGC118833;SLC2A11-a;SLC2A11-c	M-007511-00	0.12	-2.85	0.58
284904	SEC14L4	SEC14-like 4 (S. cerevisiae)	SEC14L4;TAP3	M-019246-00	0.12	-2.85	0.535
138803	OR13C3	olfactory receptor, family 13, subfamily C, member 3	OR13C3;OR37G;OR9-8	M-026225-00	0.12	-2.85	0.7
8329	HIST1H2AI	histone cluster 1, H2ai	HIST1H2AI;FLJ92027;H2A/c;H2AFC;HIST1H2AG;HIST1H2AK;HIST1H2AL;HIST1H2AM	M-011432-00	0.12	-2.85	0.85
9887	SMG7	smg-7 homolog, nonsense mediated mRNA decay factor (C. elegans)	SMG7;C1orf16;EST1C;FLJ23717;KIAA0250;SGA56M	M-021305-01	0.12	-2.85	0.86
91746	YTHDC1	YTH domain containing 1	YTHDC1;KIAA1966;YT521;YT521-B	M-015332-01	0.12	-2.85	0.66
653314	RPL19P9	ribosomal protein L19 pseudogene 9	RPL19P9;RPL19_7_643	M-039920-00	0.12	-2.85	0.59
64794	DDX31	DEAD (Asp-Glu-Ala-Asp) box polypeptide 31	DDX31;FLJ13633;FLJ14578;FLJ23349;PPP1R25	M-012931-01	0.13	-2.81	0.675
113	ADCY7	adenylate cyclase 7	ADCY7;AC7;FLJ36387;KIAA0037	M-006801-00	0.13	-2.81	0.775
25896	INTS7	integrator complex subunit 7	INTS7;C1orf73;DKFZp434B168;INT7	M-013972-01	0.13	-2.81	0.595
56893	UBQLN4	ubiquilin 4	UBQLN4;A1U;C1orf6;CIP75;UBIN	M-021178-00	0.13	-2.81	1.08
8888	MCM3AP	minichromosome maintenance complex component 3 associated protein	MCM3AP;FLJ44336;FLJ45306;GANP;KIAA0572;MAP80	M-017379-00	0.13	-2.81	0.645
138716	C9orf23	chromosome 9 open reading frame 23	C9orf23;MGC29635;bA296L22.5	M-017493-00	0.13	-2.81	0.755
79663	HSPBAP1	HSPB (heat shock 27kDa) associated protein 1	HSPBAP1;FLJ22623;FLJ39386;PASS1	M-004287-01	0.13	-2.81	0.88
51226	COPZ2	coatomer protein complex, subunit zeta 2	COPZ2;MGC23008	M-021116-01	0.13	-2.81	0.56
340267	COL28A1	collagen, type XXVIII, alpha 1	COL28A1;COL28	M-025519-02	0.14	-2.77	0.575
80135	RPF1	ribosome production factor 1 homolog (S. cerevisiae)	RPF1;BXDC5;DKFZp761G0415;DKFZp761M0215;FLJ12475;RP11-118B23.1	M-031267-01	0.14	-2.77	0.555
146802	SLC47A2	solute carrier family 47, member 2	SLC47A2;FLJ31196;MATE2;MATE2-B;MATE2-K;MATE2K	M-010964-01	0.14	-2.77	0.83
24148	PRPF6	PRP6 pre-mRNA processing factor 6 homolog (S. cerevisiae)	PRPF6;ANT-1;ANT1;C20orf14;Prp6;TOM;U5-102K;hPrp6	M-012821-01	0.14	-2.77	0.525
55696	RBM22	RNA binding motif protein 22	RBM22;Cwc2;FLJ10290;ZC3H16;fSAP47	M-021186-00	0.14	-2.77	1.015
94122	SYTL5	synaptotagmin-like 5	SYTL5;slp5	M-016567-01	0.14	-2.77	0.605
9716	AQR	aquarius homolog (mouse)	AQR;DKFZp686B23123;IBP160;KIAA0560;fSAP164	M-022214-01	0.14	-2.77	0.705
3029	HAGH	hydroxyacylglutathione hydrolase	HAGH;GLO2;GLX2;GLXII;HAGH1	M-012052-02	0.15	-2.74	0.7
4695	NDUFA2	NADH dehydrogenase (ubiquinone) 1 alpha subcomplex, 2, 8kDa	NDUFA2;B8;CD14;CIB8	M-018869-01	0.15	-2.74	0.605
353189	SLCO4C1	solute carrier organic anion transporter family, member 4C1	SLCO4C1;OATP-H;OATP-M1;OATP4C1;OATPX;PRO2176;SLC21A20	M-007374-01	0.15	-2.74	0.7
22938	SNW1	SNW domain containing 1	SNW1;Bx42;MGC119379;NCOA-62;PRPF45;Prp45;SKIIP;SKIP	M-012446-00	0.15	-2.74	0.88
51626	DYNC2LI1	dynein, cytoplasmic 2, light intermediate chain 1	DYNC2LI1;D2LIC;DKFZp564A033;LIC3	M-020872-02	0.15	-2.74	1.07
79188	TMEM43	transmembrane protein 43	TMEM43;ARVC5;ARVD5;DKFZp586G1919;LUMA;MGC3222	M-014342-01	0.15	-2.74	0.595
871	SERPINH1	serpin peptidase inhibitor, clade H (heat shock protein 47), member 1, (collagen binding protein 1)	SERPINH1;AsTP3;CBP1;CBP2;HSP47;OI10;PPROM;RA-A47;SERPINH2;gp46	M-011230-00	0.15	-2.74	0.875
5660	PSAP	prosaposin	PSAP;FLJ00245;GLBA;MGC110993;SAP1	M-003694-01	0.15	-2.74	0.985
81030	ZBP1	Z-DNA binding protein 1	ZBP1;C20orf183;DAI;DLM-1;DLM1	M-014650-00	0.15	-2.74	0.56
51077	FCF1	FCF1 small subunit (SSU) processome component homolog (S. cerevisiae)	FCF1;Bka;C14orf111;MGC99629;UTP24	M-020976-01	0.15	-2.74	0.62
3150	HMGN1	high mobility group nucleosome binding domain 1	HMGN1;FLJ27265;FLJ31471;HMG14;MGC104230;MGC117425	M-015567-00	0.15	-2.74	0.8
64902	AGXT2	alanine--glyoxylate aminotransferase 2	AGXT2;AGT2;DAIBAT	M-009818-00	0.16	-2.7	0.575
51477	ISYNA1	inositol-3-phosphate synthase 1	ISYNA1;INO1;INOS;IPS	M-009669-00	0.16	-2.7	0.675
29954	POMT2	protein-O-mannosyltransferase 2	POMT2;DKFZp686G10254;FLJ22309;MDDGA2;MDDGB2;MDDGC2	M-019142-01	0.16	-2.7	0.815
57198	ATP8B2	ATPase, class I, type 8B, member 2	ATP8B2;ATPID;DKFZp434M0219;KIAA1137	M-022341-02	0.16	-2.7	0.835
6059	ABCE1	ATP-binding cassette, sub-family E (OABP), member 1	ABCE1;ABC38;OABP;RLI;RNASEL1;RNASELI;RNS4I	M-008702-01	0.16	-2.7	0.875
29920	PYCR2	pyrroline-5-carboxylate reductase family, member 2	PYCR2;FLJ54750;P5CR2	M-016646-00	0.16	-2.7	0.725
3316	HSPB2	heat shock 27kDa protein 2	HSPB2;HSP27;Hs.78846;LOH11CR1K;MGC133245;MKBP	M-008852-00	0.16	-2.7	0.62
2331	FMOD	fibromodulin	FMOD;SLRR2E	M-011661-02	0.16	-2.7	0.615
10381	TUBB3	tubulin, beta 3 class III	TUBB3;CDCBM;CFEOM3A;TUBB4;beta-4	M-020099-03	0.16	-2.7	0.845
143241	DYDC1	DPY30 domain containing 1	DYDC1;DPY30D1;FLJ43920;bA36D19.5	M-016591-01	0.16	-2.7	0.955
51313	FAM198B	family with sequence similarity 198, member B	FAM198B;AD036;C4orf18;DKFZp434L142;FLJ23966;FLJ38155	M-018921-01	0.16	-2.7	0.665
9277	WDR46	WD repeat domain 46	WDR46;BING4;C6orf11;FP221;UTP7	M-009242-00	0.16	-2.7	0.585
80789	INTS5	integrator complex subunit 5	INTS5;INT5;KIAA1698	M-026584-00	0.16	-2.7	0.925
60673	C12orf44	chromosome 12 open reading frame 44	C12orf44;ATG101;FLJ11773	M-017816-01	0.16	-2.7	1.1
134549	SHROOM1	shroom family member 1	SHROOM1;APXL2;KIAA1960	M-015348-00	0.16	-2.7	0.74
414059	TBC1D3B	TBC1 domain family, member 3B	TBC1D3B;FLJ78399;PRC17;TBC1D3I	M-032309-01	0.16	-2.7	0.64
64083	GOLPH3	golgi phosphoprotein 3 (coat-protein)	GOLPH3;FLJ90675;GOPP1;GPP34;MIDAS	M-006414-00	0.16	-2.7	1.07
3125	HLA-DRB3	major histocompatibility complex, class II, DR beta 3	HLA-DRB3;HLA-DR3B;HLA-DRB1;MGC117330	M-013204-00	0.16	-2.7	0.535
83987	CCDC8	coiled-coil domain containing 8	CCDC8;3M3;DKFZp564K0322	M-014775-01	0.16	-2.7	0.65
23560	GTPBP4	GTP binding protein 4	GTPBP4;CRFG;FLJ10686;FLJ10690;FLJ39774;NGB;NOG1	M-012467-01	0.16	-2.7	0.79
92840	REEP6	receptor accessory protein 6	REEP6;C19orf32;DP1L1;FLJ25383;TB2L1	M-015555-00	0.16	-2.7	0.685
6829	SUPT5H	suppressor of Ty 5 homolog (S. cerevisiae)	SUPT5H;FLJ34157;SPT5;SPT5H;Tat-CT1	M-016234-01	0.16	-2.7	0.83
6124	RPL4	ribosomal protein L4	RPL4;L4	M-008956-00	0.16	-2.7	0.59
6141	RPL18	ribosomal protein L18	RPL18;L18	M-011142-02	0.16	-2.7	0.76
7514	XPO1	exportin 1 (CRM1 homolog, yeast)	XPO1;CRM1;DKFZp686B1823;emb;exp1	M-003030-02	0.17	-2.66	0.735
122953	JDP2	Jun dimerization protein 2	JDP2;JUNDM2	M-008321-01	0.17	-2.66	0.835
127428	TCEANC2	transcription elongation factor A (SII) N-terminal and central domain containing 2	TCEANC2;C1orf83;FLJ32112;FLJ39169;RP4-758J24.3	M-015486-00	0.17	-2.66	0.52
9282	MED14	mediator complex subunit 14	MED14;CRSP150;CRSP2;CSRP;CXorf4;DRIP150;EXLM1;MGC104513;RGR1;TRAP170	M-011928-01	0.17	-2.66	0.905
30836	DNTTIP2	deoxynucleotidyltransferase, terminal, interacting protein 2	DNTTIP2;ERBP;FCF2;FLJ98849;HSU15552;LPTS-RP2;MGC163494;TdIF2	M-020513-01	0.17	-2.66	0.54
55813	UTP6	UTP6, small subunit (SSU) processome component, homolog (yeast)	UTP6;C17orf40;HCA66	M-010579-01	0.17	-2.66	0.81
85320	ABCC11	ATP-binding cassette, sub-family C (CFTR/MRP), member 11	ABCC11;EWWD;MRP8;WW	M-004344-02	0.18	-2.62	0.94
51171	HSD17B14	hydroxysteroid (17-beta) dehydrogenase 14	HSD17B14;DHRS10;SDR47C1;retSDR3	M-009481-01	0.18	-2.62	0.59
1040	CDS1	CDP-diacylglycerol synthase (phosphatidate cytidylyltransferase) 1	CDS1;CDS	M-008680-01	0.18	-2.62	0.535
51267	CLEC1A	C-type lectin domain family 1, member A	CLEC1A;CLEC1;MGC34328	M-021368-00	0.18	-2.62	0.71
54520	CCDC93	coiled-coil domain containing 93	CCDC93;FLJ10996;FLJ25197;MGC13033	M-016945-01	0.18	-2.62	1.105
286464	CXorf59	chromosome X open reading frame 59	CXorf59;FLJ36601;MGC126747;MGC126749	M-018043-00	0.18	-2.62	0.71
9715	FAM131B	family with sequence similarity 131, member B	FAM131B;KIAA0773	M-020927-01	0.18	-2.62	0.765
345079	ANKRD56	ankyrin repeat domain 56	ANKRD56	M-023947-01	0.18	-2.62	0.7
54657	UGT1A4	UDP glucuronosyltransferase 1 family, polypeptide A4	UGT1A4;HUG-BR2;UDPGT;UDPGT 1-4;UGT-1D;UGT1-04;UGT1.4;UGT1D	M-019627-01	0.18	-2.62	0.905
8735	MYH13	myosin, heavy chain 13, skeletal muscle	MYH13;MyHC-eo	M-012621-01	0.18	-2.62	1.06
57456	KIAA1143	KIAA1143	KIAA1143	M-013876-01	0.18	-2.62	0.865
83596	BCL2L12	BCL2-like 12 (proline rich)	BCL2L12;MGC120313;MGC120314;MGC120315	M-017207-01	0.18	-2.62	0.645
57633	LRRN1	leucine rich repeat neuronal 1	LRRN1;FIGLER3;KIAA1497;NLRR-1	M-019481-02	0.18	-2.62	0.71
9144	SYNGR2	synaptogyrin 2	SYNGR2;MGC102914	M-011914-01	0.18	-2.62	0.76
3908	LAMA2	laminin, alpha 2	LAMA2;LAMM	M-011070-01	0.18	-2.62	0.88
9940	DLEC1	deleted in lung and esophageal cancer 1	DLEC1;DLC1;F56	M-011983-01	0.19	-2.59	0.595
10284	SAP18	Sin3A-associated protein, 18kDa	SAP18;2HOR0202;MGC27131;SAP18P	M-012140-00	0.19	-2.59	0.605
168537	GIMAP7	GTPase, IMAP family member 7	GIMAP7;IAN7;MGC27027;hIAN7	M-017612-01	0.19	-2.59	0.55
51118	UTP11L	UTP11-like, U3 small nucleolar ribonucleoprotein, (yeast)	UTP11L;CGI94	M-021018-01	0.19	-2.59	0.71
9685	CLINT1	clathrin interactor 1	CLINT1;CLINT;ENTH;EPN4;EPNR;FLJ46753;KIAA0171	M-021406-00	0.19	-2.59	0.725
84330	ZNF414	zinc finger protein 414	ZNF414;MGC15716;ZFP414	M-014882-00	0.19	-2.59	0.655
259307	IL4I1	interleukin 4 induced 1	IL4I1;FIG1	M-008109-00	0.19	-2.59	0.565
71	ACTG1	actin, gamma 1	ACTG1;ACT;ACTG;DFNA20;DFNA26	M-005265-01	0.19	-2.59	0.81
58509	C19orf29	chromosome 19 open reading frame 29	C19orf29;FLJ17482;FLJ59622;NY-REN-24;cactin;fSAPc	M-031204-01	0.19	-2.59	0.665
256949	KANK3	KN motif and ankyrin repeat domains 3	KANK3;ANKRD47;FLJ46061	M-031728-01	0.19	-2.59	0.89
5076	PAX2	paired box 2	PAX2	M-003921-02	0.2	-2.55	0.735
51400	PPME1	protein phosphatase methylesterase 1	PPME1;FLJ22226;PME-1	M-005211-00	0.2	-2.55	0.575
8534	CHST1	carbohydrate (keratan sulfate Gal-6) sulfotransferase 1	CHST1;C6ST;GST-1;KS6ST;KSGal6ST;KSST	M-008967-01	0.2	-2.55	0.875
51046	ST8SIA3	ST8 alpha-N-acetyl-neuraminide alpha-2,8-sialyltransferase 3	ST8SIA3;SIAT8C;ST8SiaIII	M-020935-02	0.2	-2.55	0.9
29115	SAP30BP	SAP30 binding protein	SAP30BP;DKFZp586L2022;HCNGP;HTRG;HTRP	M-016834-01	0.2	-2.55	0.78
23414	ZFPM2	zinc finger protein, multitype 2	ZFPM2;DIH3;FOG2;MGC129663;MGC129664;ZNF89B;hFOG-2	M-012405-00	0.2	-2.55	0.79
10622	POLR3G	polymerase (RNA) III (DNA directed) polypeptide G (32kD)	POLR3G;RPC32;RPC7	M-020140-01	0.2	-2.55	0.89
4499	MT1M	metallothionein 1M	MT1M;MGC118949;MGC40498;MT-1M;MT-IM;MT1;MT1K	M-018063-00	0.2	-2.55	0.925
81931	ZNF93	zinc finger protein 93	ZNF93;HPF34;HTF34;TF34;ZNF505	M-014698-00	0.2	-2.55	0.66
10005	ACOT8	acyl-CoA thioesterase 8	ACOT8;HNAACTE;PTE-1;PTE-2;PTE1;PTE2;hACTE-III;hTE	M-009600-01	0.2	-2.55	0.965
4286	MITF	microphthalmia-associated transcription factor	MITF;MI;WS2;WS2A;bHLHe32	M-008674-00	0.2	-2.55	0.68
4247	MGAT2	mannosyl (alpha-1,6-)-glycoprotein beta-1,2-N-acetylglucosaminyltransferase	MGAT2;CDG2A;CDGS2;GLCNACTII;GNT-II;GNT2	M-011333-01	0.2	-2.55	0.825
57462	KIAA1161	KIAA1161	KIAA1161;NET37	M-026129-01	0.2	-2.55	0.6
6813	STXBP2	syntaxin binding protein 2	STXBP2;FHL5;Hunc18b;MUNC18-2;UNC18-2;UNC18B;pp10122	M-019713-00	0.2	-2.55	0.865
284406	ZFP82	zinc finger protein 82 homolog (mouse)	ZFP82;KIAA1948;MGC45380;ZNF545	M-015354-01	0.2	-2.55	0.615
171489	SPANXE	SPANX family, member E	SPANXE;MGC71908	M-017421-01	0.2	-2.55	0.62
26239	LCE2B	late cornified envelope 2B	LCE2B;LEP10;SPRL1B;XP5	M-012513-02	0.2	-2.55	0.705
85456	TNKS1BP1	tankyrase 1 binding protein 1, 182kDa	TNKS1BP1;FLJ45975;KIAA1741;TAB182	M-015106-01	0.2	-2.55	0.71
92856	IMP4	IMP4, U3 small nucleolar ribonucleoprotein, homolog (yeast)	IMP4;BXDC4;MGC19606	M-015116-00	0.2	-2.55	0.93
10367	MICU1	mitochondrial calcium uptake 1	MICU1;CALC;CBARA1;DKFZp564C246;EFHA3;FLJ12684	M-012720-01	0.2	-2.55	0.62
81846	SBF2	SET binding factor 2	SBF2;CMT4B2;DKFZp779B2327;FLJ22918;FLJ41627;KIAA1766;MTMR13	M-014684-01	0.2	-2.55	0.76
56902	PNO1	partner of NOB1 homolog (S. cerevisiae)	PNO1;KHRBP1;RRP20	M-018033-00	0.2	-2.55	0.84
3087	HHEX	hematopoietically expressed homeobox	HHEX;HEX;HMPH;HOX11L-PEN;PRH;PRHX	M-011756-01	0.2	-2.55	0.685
55722	CEP72	centrosomal protein 72kDa	CEP72;FLJ10565;KIAA1519;MGC5307	M-020549-01	0.2	-2.55	0.95
10537	UBD	ubiquitin D	UBD;FAT10;GABBR1;UBD-3	M-008266-03	0.21	-2.51	0.68
8880	FUBP1	far upstream element (FUSE) binding protein 1	FUBP1;FBP;FUBP	M-011548-01	0.21	-2.51	0.695
85313	PPIL4	peptidylprolyl isomerase (cyclophilin)-like 4	PPIL4;HDCME13P	M-010401-00	0.21	-2.51	0.71
341032	C11orf53	chromosome 11 open reading frame 53	C11orf53;MGC50104	M-027244-00	0.21	-2.51	0.595
51466	EVL	Enah/Vasp-like	EVL;RNB6	M-020877-01	0.21	-2.51	1.045
57050	UTP3	UTP3, small subunit (SSU) processome component, homolog (S. cerevisiae)	UTP3;CRL1;CRLZ1;FLJ23256;SAS10	M-020970-00	0.21	-2.51	0.71
7201	TRHR	thyrotropin-releasing hormone receptor	TRHR;MGC141920;TRH-R	M-005747-01	0.22	-2.47	0.87
3764	KCNJ8	potassium inwardly-rectifying channel, subfamily J, member 8	KCNJ8;KIR6.1;uKATP-1	M-006252-00	0.22	-2.47	0.78
689	BTF3	basic transcription factor 3	BTF3;BETA-NAC;BTF3a;BTF3b;NACB	M-016634-01	0.22	-2.47	0.665
2130	EWSR1	Ewing sarcoma breakpoint region 1	EWSR1;EWS;bK984G1.4	M-005119-03	0.22	-2.47	0.98
3159	HMGA1	high mobility group AT-hook 1	HMGA1;HMG-R;HMGA1A;HMGIY;MGC12816;MGC4242;MGC4854	M-004597-02	0.22	-2.47	0.955
11216	AKAP10	A kinase (PRKA) anchor protein 10	AKAP10;D-AKAP2;MGC9414;PRKA10	M-017300-01	0.22	-2.47	0.785
3801	KIFC3	kinesin family member C3	KIFC3;DKFZp686D23201;FLJ34694	M-008338-02	0.22	-2.47	0.915
6096	RORB	RAR-related orphan receptor B	RORB;NR1F2;ROR-BETA;RZR-BETA;RZRB;bA133M9.1	M-003441-02	0.22	-2.47	0.7
192668	CYS1	cystin 1	CYS1;FLJ33980	M-032782-01	0.22	-2.47	0.875
55243	KIRREL	kin of IRRE like (Drosophila)	KIRREL;FLJ10845;MGC129542;MGC129543;NEPH1	M-019453-01	0.22	-2.47	0.755
57719	ANO8	anoctamin 8	ANO8;KIAA1623;TMEM16H	M-031248-02	0.22	-2.47	0.64
1968	EIF2S3	eukaryotic translation initiation factor 2, subunit 3 gamma, 52kDa	EIF2S3;EIF2;EIF2G;EIF2gamma;eIF-2gA	M-017045-01	0.22	-2.47	0.92
3158	HMGCS2	3-hydroxy-3-methylglutaryl-CoA synthase 2 (mitochondrial)	HMGCS2	M-010179-01	0.22	-2.47	0.935
91319	DERL3	Der1-like domain family, member 3	DERL3;C22orf14;IZP6;LLN2;MGC71803;derlin-3	M-032237-01	0.22	-2.47	0.6
6152	RPL24	ribosomal protein L24	RPL24;L24	M-011144-02	0.22	-2.47	0.65
64863	METTL4	methyltransferase like 4	METTL4;FLJ23017;HsT661;MGC117235	M-014226-01	0.22	-2.47	0.765
8076	MFAP5	microfibrillar associated protein 5	MFAP5;MAGP2;MP25	M-011425-00	0.22	-2.47	1.135
8969	HIST1H2AG	histone cluster 1, H2ag	HIST1H2AG;H2A.1b;H2A/p;H2AFP;HIST1H2AI;HIST1H2AK;HIST1H2AL;HIST1H2AM;pH2A/f	M-013117-02	0.22	-2.47	0.835
81341	OR10W1	olfactory receptor, family 10, subfamily W, member 1	OR10W1;OR10W1P;OR10W1Q;OR11-236;UNQ6469	M-032711-01	0.22	-2.47	1.045
653499	LGALS7B	lectin, galactoside-binding, soluble, 7B	LGALS7B;GAL7;Gal-7;HKL-14;LGALS7;MGC75149;MGC88745;PI7	M-180007-00	0.22	-2.47	0.62
1398	CRK	v-crk sarcoma virus CT10 oncogene homolog (avian)	CRK;CRKII	M-010503-03	0.22	-2.47	0.66
9786	KIAA0586	KIAA0586	KIAA0586;Talpid3	M-020892-01	0.22	-2.47	0.85
10879	SMR3B	submaxillary gland androgen regulated protein 3B	SMR3B;MGC104379;P-B;PBII;PRL3;PROL3;SMR1B	M-020063-02	0.22	-2.47	0.72
54813	KLHL28	kelch-like 28 (Drosophila)	KLHL28;BTBD5;FLJ20081	M-020611-01	0.22	-2.47	0.84
23521	RPL13A	ribosomal protein L13a	RPL13A;L13A;TSTA1	M-013601-01	0.22	-2.47	0.64
5837	PYGM	phosphorylase, glycogen, muscle	PYGM	M-009367-02	0.23	-2.44	0.79
56950	SMYD2	SET and MYND domain containing 2	SMYD2;HSKM-B;KMT3C;MGC119305;ZMYND14	M-020291-00	0.23	-2.44	0.815
10135	NAMPT	nicotinamide phosphoribosyltransferase	NAMPT;1110035O14Rik;DKFZp666B131;MGC117256;PBEF;PBEF1;VF;VISFATIN	M-004581-01	0.23	-2.44	0.94
3622	ING2	inhibitor of growth family, member 2	ING2;ING1L;p33ING2	M-006534-01	0.23	-2.44	0.855
6500	SKP1	S-phase kinase-associated protein 1	SKP1;EMC19;MGC34403;OCP-II;OCP2;SKP1A;TCEB1L;p19A	M-003323-04	0.23	-2.44	0.585
4853	NOTCH2	notch 2	NOTCH2;AGS2;HJCYS;hN2	M-012235-00	0.23	-2.44	1.1
79767	ELMO3	engulfment and cell motility 3	ELMO3;CED-12;CED12;ELMO-3;FLJ13824	M-012936-01	0.23	-2.44	1.02
120237	DBX1	developing brain homeobox 1	DBX1	M-026866-02	0.23	-2.44	0.985
148014	TTC9B	tetratricopeptide repeat domain 9B	TTC9B;FLJ30373;MGC33962	M-016205-01	0.23	-2.44	0.71
113177	IZUMO4	IZUMO family member 4	IZUMO4;C19orf36;IMAGE:4215339	M-023899-02	0.23	-2.44	0.675
8729	GBF1	golgi brefeldin A resistant guanine nucleotide exchange factor 1	GBF1;ARF1GEF;FLJ21263;FLJ21500;KIAA0248;MGC134877;MGC134878	M-019783-01	0.23	-2.44	0.71
79641	ROGDI	rogdi homolog (Drosophila)	ROGDI;FLJ22386	M-014379-02	0.23	-2.44	1.025
57573	ZNF471	zinc finger protein 471	ZNF471;ERP1;KIAA1396;MGC150657;MGC150658;Z1971	M-014067-01	0.23	-2.44	0.91
23362	PSD3	pleckstrin and Sec7 domain containing 3	PSD3;DKFZp761K1423;EFA6R;HCA67	M-014030-01	0.23	-2.44	0.545
7311	UBA52	ubiquitin A-52 residue ribosomal protein fusion product 1	UBA52;CEP52;HUBCEP52;L40;MGC126879;MGC126881;MGC57125;RPL40	M-011794-01	0.24	-2.4	0.64
2318	FLNC	filamin C, gamma	FLNC;ABP-280;ABP280A;ABPA;ABPL;FLJ10186;FLN2;MFM5;MPD4	M-011272-01	0.24	-2.4	0.64
7264	TSTA3	tissue specific transplantation antigen P35B	TSTA3;FX;P35B;SDR4E1	M-011412-01	0.24	-2.4	0.655
1603	DAD1	defender against cell death 1	DAD1;OST2	M-004414-00	0.24	-2.4	0.545
7008	TEF	thyrotrophic embryonic factor	TEF;KIAA1655	M-008769-00	0.24	-2.4	0.765
2745	GLRX	glutaredoxin (thioltransferase)	GLRX;FLJ43648;GRX;GRX1;MGC117407	M-012634-01	0.24	-2.4	0.95
22925	PLA2R1	phospholipase A2 receptor 1, 180kDa	PLA2R1;CLEC13C;PLA2-R;PLA2G1R;PLA2IR;PLA2R	M-015328-01	0.24	-2.4	0.69
9231	DLG5	discs, large homolog 5 (Drosophila)	DLG5;KIAA0583;LP-DLG;P-DLG5;PDLG	M-008495-01	0.24	-2.4	1.1
9232	PTTG1	pituitary tumor-transforming 1	PTTG1;EAP1;HPTTG;MGC126883;MGC138276;PTTG;TUTR1	M-004308-01	0.24	-2.4	0.545
1482	NKX2-5	NK2 homeobox 5	NKX2-5;CHNG5;CSX;CSX1;FLJ52202;FLJ97166;FLJ97195;FLJ97197;FLJ99536;NKX2.5;NKX2E;NKX4-1	M-019795-02	0.24	-2.4	0.61
9338	TCEAL1	transcription elongation factor A (SII)-like 1	TCEAL1;SIIR;p21;pp21	M-019850-01	0.24	-2.4	0.775
79009	DDX50	DEAD (Asp-Glu-Ala-Asp) box polypeptide 50	DDX50;GU2;GUB;MGC3199;RH-II/GuB	M-004255-00	0.24	-2.4	0.685
55718	POLR3E	polymerase (RNA) III (DNA directed) polypeptide E (80kD)	POLR3E;RPC5;SIN	M-020773-00	0.24	-2.4	1.015
403314	APOBEC4	apolipoprotein B mRNA editing enzyme, catalytic polypeptide-like 4 (putative)	APOBEC4;C1orf169;MGC26594	M-031778-01	0.24	-2.4	0.845
134288	TMEM174	transmembrane protein 174	TMEM174;FLJ31268;MGC13034	M-016731-01	0.24	-2.4	0.775
145781	GCOM1	GRINL1A complex locus	GCOM1;FLJ30973;GRINL1A;Gcom2;Gup;Gup1;Gup2;MGC126694;MGC138353;MYOZAP	M-016361-01	0.24	-2.4	0.76
84106	PRAM1	PML-RARA regulated adaptor molecule 1	PRAM1;MGC39864;PML-RAR;PRAM-1	M-018654-00	0.24	-2.4	0.75
80731	THSD7B	thrombospondin, type I, domain containing 7B	THSD7B;KIAA1679	M-022909-01	0.24	-2.4	0.87
222171	PRR15	proline rich 15	PRR15	M-018053-00	0.24	-2.4	0.745
283420	CLEC9A	C-type lectin domain family 9, member A	CLEC9A;DNGR1;UNQ9341	M-032040-01	0.24	-2.4	0.64
64131	XYLT1	xylosyltransferase I	XYLT1;PXYLT1;XT-I;XT1;XTI;XYLTI	M-013749-01	0.24	-2.4	1.165
11325	DDX42	DEAD (Asp-Glu-Ala-Asp) box polypeptide 42	DDX42;FLJ43179;RHELP;RNAHP;SF3b125	M-012393-00	0.24	-2.4	0.925
51102	MECR	mitochondrial trans-2-enoyl-CoA reductase	MECR;CGI-63;FASN2B;NRBF1	M-009881-01	0.24	-2.4	1.03
9276	COPB2	coatomer protein complex, subunit beta 2 (beta prime)	COPB2;beta'-COP	M-019847-03	0.24	-2.4	0.74
4678	NASP	nuclear autoantigenic sperm protein (histone-binding)	NASP;DKFZp547F162;FLB7527;FLJ31599;FLJ35510;MGC19722;MGC20372;MGC2297;PRO1999	M-011740-02	0.24	-2.4	0.745
2576	GAGE4	G antigen 4	GAGE4;CT4.4	M-011275-00	0.24	-2.4	0.76
26064	RAI14	retinoic acid induced 14	RAI14;DKFZp564G013;KIAA1334;NORPEG;RAI13	M-013919-00	0.24	-2.4	0.8
81850	KRTAP1-3	keratin associated protein 1-3	KRTAP1-3;KAP1.2;KAP1.3;KAP1.6;KAP1.8A;KAP1.8B;KAP1.9;KRTAP1.3;MGC119903;MGC119904;MGC119905	M-013466-02	0.24	-2.4	0.705
116113	FOXP4	forkhead box P4	FOXP4;FLJ40908;FLJ44184;hFKHLA	M-008255-01	0.24	-2.4	1.05
57187	THOC2	THO complex 2	THOC2;CXorf3;THO2;dJ506G2.1;hTREX120	M-025006-01	0.24	-2.4	0.82
388969	C2orf68	chromosome 2 open reading frame 68	C2orf68;FLJ14112;FLJ35653;MGC131675	M-027866-01	0.24	-2.4	0.94
4676	NAP1L4	nucleosome assembly protein 1-like 4	NAP1L4;MGC4565;NAP1L4b;NAP2;NAP2L;hNAP2	M-012183-01	0.24	-2.4	0.725
389827	TMEM8C	transmembrane protein 8C	TMEM8C;TMEM226	M-029520-01	0.24	-2.4	0.61
375061	FAM89A	family with sequence similarity 89, member A	FAM89A;C1orf153;MGC15887;RP11-423F24.2	M-027264-01	0.24	-2.4	0.695
448834	KPRP	keratinocyte proline-rich protein	KPRP;C1orf45	M-034889-00	0.24	-2.4	0.7
63932	CXorf56	chromosome X open reading frame 56	CXorf56;FLJ22965	M-013901-00	0.24	-2.4	0.51
6137	RPL13	ribosomal protein L13	RPL13;BBC1;D16S444E;D16S44E;FLJ27453;FLJ27454;FLJ38635;L13;MGC117342;MGC71373	M-013714-00	0.24	-2.4	0.72
10013	HDAC6	histone deacetylase 6	HDAC6;FLJ16239;HD6	M-003499-00	0.25	-2.36	0.72
7276	TTR	transthyretin	TTR;CTS;CTS1;HsT2651;PALB;TBPA	M-012554-02	0.25	-2.36	0.69
5320	PLA2G2A	phospholipase A2, group IIA (platelets, synovial fluid)	PLA2G2A;MOM1;PLA2;PLA2B;PLA2L;PLA2S;PLAS1;sPLA2	M-009901-03	0.25	-2.36	0.885
6182	MRPL12	mitochondrial ribosomal protein L12	MRPL12;5c5-2;FLJ60124;L12mt;MGC8610;MRP-L31/34;MRPL7;MRPL7/L12;RPML12	M-017517-00	0.25	-2.36	0.565
7473	WNT3	wingless-type MMTV integration site family, member 3	WNT3;INT4;MGC131950;MGC138321;MGC138323	M-009712-00	0.25	-2.36	1.095
93129	ORAI3	ORAI calcium release-activated calcium modulator 3	ORAI3;MGC13024;TMEM142C	M-015896-00	0.25	-2.36	0.735
1662	DDX10	DEAD (Asp-Glu-Ala-Asp) box polypeptide 10	DDX10;HRH-J8	M-011842-01	0.25	-2.36	0.755
160365	CLECL1	C-type lectin-like 1	CLECL1;DCAL1	M-016625-00	0.25	-2.36	0.64
64651	CSRNP1	cysteine-serine-rich nuclear protein 1	CSRNP1;AXUD1;CSRNP-1;DKFZp566F164;FAM130B;TAIP-3;URAX1	M-013653-00	0.25	-2.36	0.67
59348	ZNF350	zinc finger protein 350	ZNF350;ZBRK1;ZFQR	M-017814-01	0.25	-2.36	0.795
22906	TRAK1	trafficking protein, kinesin binding 1	TRAK1;MILT1;OIP106	M-020331-02	0.25	-2.36	0.945
5438	POLR2I	polymerase (RNA) II (DNA directed) polypeptide I, 14.5kDa	POLR2I;RPB9;hRPB14.5	M-012248-00	0.25	-2.36	0.785
1350	COX7C	cytochrome c oxidase subunit VIIc	COX7C	M-013317-00	0.26	-2.32	1.025
9173	IL1RL1	interleukin 1 receptor-like 1	IL1RL1;DER4;FIT-1;IL33R;MGC32623;ST2;ST2L;ST2V;T1	M-007963-00	0.26	-2.32	1.085
23157	2006-09-01	septin 6	SEPT6;KIAA0128;MGC16619;MGC20339;SEP2;SEPT2	M-019260-01	0.26	-2.32	0.965
3976	LIF	leukemia inhibitory factor (cholinergic differentiation factor)	LIF;CDF;DIA;HILDA	M-011720-00	0.26	-2.32	1.05
116179	TGM7	transglutaminase 7	TGM7;TGMZ	M-008606-01	0.26	-2.32	0.63
8639	AOC3	amine oxidase, copper containing 3 (vascular adhesion protein 1)	AOC3;HPAO;SSAO;VAP-1;VAP1	M-010143-00	0.26	-2.32	0.61
23495	TNFRSF13B	tumor necrosis factor receptor superfamily, member 13B	TNFRSF13B;CD267;CVID;CVID2;FLJ39942;MGC133214;MGC39952;TACI;TNFRSF14B	M-008095-00	0.26	-2.32	1.035
2744	GLS	glutaminase	GLS;AAD20;DKFZp686O15119;FLJ10358;GLS1;KIAA0838	M-004548-01	0.26	-2.32	1.005
1438	CSF2RA	colony stimulating factor 2 receptor, alpha, low-affinity (granulocyte-macrophage)	CSF2RA;CD116;CDw116;CSF2R;CSF2RAX;CSF2RAY;CSF2RX;CSF2RY;GM-CSF-R-alpha;GMCSFR;GMR;MGC3848;MGC4838	M-007864-00	0.26	-2.32	0.83
96764	TGS1	trimethylguanosine synthase 1	TGS1;DKFZp762A163;FLJ22995;NCOA6IP;PIMT;PIPMT	M-017151-01	0.26	-2.32	1.15
60468	BACH2	BTB and CNC homology 1, basic leucine zipper transcription factor 2	BACH2	M-009787-00	0.26	-2.32	0.995
4795	NFKBIL1	nuclear factor of kappa light polypeptide gene enhancer in B-cells inhibitor-like 1	NFKBIL1;IKBL;LST1;NFKBIL	M-012001-00	0.26	-2.32	0.9
10606	PAICS	phosphoribosylaminoimidazole carboxylase, phosphoribosylaminoimidazole succinocarboxamide synthetase	PAICS;ADE2;ADE2H1;AIRC;DKFZp781N1372;MGC1343;MGC5024;PAIS	M-003980-03	0.26	-2.32	1.1
23660	ZKSCAN5	zinc finger with KRAB and SCAN domains 5	ZKSCAN5;FLJ39233;KIAA1015;MGC33710;ZFP95;ZNF914	M-013583-01	0.26	-2.32	0.685
324	APC	adenomatous polyposis coli	APC;BTPS2;DP2;DP2.5;DP3;GS;PPP1R46	M-003869-01	0.26	-2.32	0.975
2707	GJB3	gap junction protein, beta 3, 31kDa	GJB3;CX31;DFNA2;DFNA2B;EKV;FLJ22486;MGC102938	M-019948-02	0.26	-2.32	0.66
84125	LRRIQ1	leucine-rich repeats and IQ motif containing 1	LRRIQ1;FLJ12303	M-032523-01	0.26	-2.32	1.07
391192	OR2L3	olfactory receptor, family 2, subfamily L, member 3	OR2L3	M-027439-03	0.26	-2.32	0.635
221786	FAM200A	family with sequence similarity 200, member A	FAM200A;C7orf38;DKFZp727G131;FLJ36794	M-017383-01	0.26	-2.32	0.625
26065	LSM14A	LSM14A, SCD6 homolog A (S. cerevisiae)	LSM14A;C19orf13;DKFZp434D1335;FAM61A;RAP55;RAP55A	M-013920-00	0.26	-2.32	0.675
343099	CCDC18	coiled-coil domain containing 18	CCDC18;NY-SAR-41;dJ717I23.1	M-021630-01	0.26	-2.32	1.14
112752	IFT43	intraflagellar transport 43 homolog (Chlamydomonas)	IFT43;C14orf179;CED3;FLJ32173;MGC16028	M-015150-01	0.26	-2.32	0.86
340061	TMEM173	transmembrane protein 173	TMEM173;ERIS;FLJ38577;MITA;MPYS;NET23;STING	M-024333-00	0.26	-2.32	0.87
374977	HEATR8	HEAT repeat containing 8	HEATR8;C1orf175;DKFZp434K085;DKFZp686L2332;DKFZp781B0622;FLJ45063;FLJ46354	M-027321-01	0.26	-2.32	0.535
140689	CBLN4	cerebellin 4 precursor	CBLN4;CBLNL1	M-013335-01	0.26	-2.32	0.87
51646	YPEL5	yippee-like 5 (Drosophila)	YPEL5	M-020317-00	0.26	-2.32	0.615
57616	TSHZ3	teashirt zinc finger homeobox 3	TSHZ3;FLJ54422;KIAA1474;TSH3;ZNF537	M-014119-01	0.26	-2.32	0.605
79618	HMBOX1	homeobox containing 1	HMBOX1;FLJ21616;HNF1LA;PBHNF	M-014367-00	0.26	-2.32	0.955
647060	FAM75A1	family with sequence similarity 75, member A1	FAM75A1;C9orf36;C9orf36A	M-037730-01	0.26	-2.32	0.665
146849	CCDC42	coiled-coil domain containing 42	CCDC42;CCDC42A;FLJ32734	M-015818-00	0.26	-2.32	0.99
196441	ZFC3H1	zinc finger, C3H1-type containing	ZFC3H1;CCDC131;DKFZp686A0722;KIAA0546;MGC23401;MGC90200;PSRC2	M-020839-01	0.26	-2.32	0.865
4782	NFIC	nuclear factor I/C (CCAAT-binding transcription factor)	NFIC;CTF;CTF5;MGC20153;NF-I;NFI	M-008362-00	0.26	-2.32	0.625
159	ADSS	adenylosuccinate synthase	ADSS;ADEH;MGC20404	M-009289-01	0.26	-2.32	0.79
4259	MGST3	microsomal glutathione S-transferase 3	MGST3;GST-III	M-008382-00	0.26	-2.32	0.82
7292	TNFSF4	tumor necrosis factor (ligand) superfamily, member 4	TNFSF4;CD134L;CD252;GP34;OX-40L;OX4OL;TXGP1	M-011416-00	0.26	-2.32	0.685
51691	NAA38	N(alpha)-acetyltransferase 38, NatC auxiliary subunit	NAA38;FLJ33242;LSM8	M-017030-01	0.26	-2.32	0.8
26019	UPF2	UPF2 regulator of nonsense transcripts homolog (yeast)	UPF2;DKFZp434D222;HUPF2;KIAA1408;MGC138834;MGC138835;RENT2;smg-3	M-012993-01	0.26	-2.32	0.6
312	ANXA13	annexin A13	ANXA13;ANX13;ISA;MGC150460	M-011811-01	0.26	-2.32	1.105
10252	SPRY1	sprouty homolog 1, antagonist of FGF signaling (Drosophila)	SPRY1;hSPRY1	M-027339-00	0.26	-2.32	0.77
5720	PSME1	proteasome (prosome, macropain) activator subunit 1 (PA28 alpha)	PSME1;IFI5111;MGC8628;PA28A;PA28alpha;REGalpha	M-012254-00	0.26	-2.32	0.84
352999	C6orf58	chromosome 6 open reading frame 58	C6orf58;MGC72003	M-181825-00	0.26	-2.32	0.58
65986	ZBTB10	zinc finger and BTB domain containing 10	ZBTB10;FLJ12752;RINZF	M-007058-01	0.26	-2.32	0.555
551	AVP	arginine vasopressin	AVP;ADH;ARVP;AVP-NPII;AVRP;VP	M-010997-01	0.26	-2.32	0.7
80306	MED28	mediator complex subunit 28	MED28;1500003D12Rik;DKFZp434N185;EG1;magicin	M-014606-01	0.26	-2.32	0.785
94235	GNG8	guanine nucleotide binding protein (G protein), gamma 8	GNG8	M-031976-02	0.26	-2.32	1.06
85442	KNDC1	kinase non-catalytic C-lobe domain (KIND) containing 1	KNDC1;C10orf23;FLJ16067;RASGEF2;bB439H18.3	M-026275-01	0.26	-2.32	0.655
10778	ZNF271	zinc finger protein 271	ZNF271;HZF7;ZNFEB	M-015671-01	0.26	-2.32	0.67
79073	TMEM109	transmembrane protein 109	TMEM109;MGC5508	M-014298-00	0.26	-2.32	0.56
57592	ZNF687	zinc finger protein 687	ZNF687;DKFZp781I1719;KIAA1441	M-007036-00	0.26	-2.32	0.845
6228	RPS23	ribosomal protein S23	RPS23;FLJ35016;S23	M-011154-01	0.26	-2.32	0.87
10607	TBL3	transducin (beta)-like 3	TBL3;SAZD;UTP13	M-017431-01	0.26	-2.32	0.975
7272	TTK	TTK protein kinase	TTK;CT96;ESK;FLJ38280;MPS1;MPS1L1;PYT	M-004105-00	0.27	-2.29	0.7
5361	PLXNA1	plexin A1	PLXNA1;DKFZp761P19121;NOV;NOVP;PLEXIN-A1;PLXN1	M-031971-01	0.27	-2.29	0.6
57541	ZNF398	zinc finger protein 398	ZNF398;KIAA1339;P51;P71;ZER6	M-013163-01	0.27	-2.29	0.82
7923	HSD17B8	hydroxysteroid (17-beta) dehydrogenase 8	HSD17B8;D6S2245E;FABG;FABGL;H2-KE6;HKE6;KE6;RING2;SDR30C1;dJ1033B10.9	M-008141-02	0.27	-2.29	0.895
2005	ELK4	ELK4, ETS-domain protein (SRF accessory protein 1)	ELK4;DKFZp434N185;SAP1	M-010315-01	0.27	-2.29	1.085
57547	ZNF624	zinc finger protein 624	ZNF624;KIAA1349;MGC119602;MGC119603;MGC119605	M-023051-00	0.27	-2.29	0.865
92558	CCDC64	coiled-coil domain containing 64	CCDC64;BICDR-1;FLJ26450;H_267D11.1	M-027129-01	0.27	-2.29	0.695
132989	C4orf36	chromosome 4 open reading frame 36	C4orf36;MGC26744	M-016011-02	0.27	-2.29	0.855
6594	SMARCA1	SWI/SNF related, matrix associated, actin dependent regulator of chromatin, subfamily a, member 1	SMARCA1;DKFZp686D1623;FLJ41547;ISWI;NURF140;SNF2L;SNF2L1;SNF2LB;SNF2LT;SWI;SWI2	M-011392-01	0.27	-2.29	0.845
92483	LDHAL6B	lactate dehydrogenase A-like 6B	LDHAL6B;LDH6B;LDHAL6;LDHL	M-008908-02	0.27	-2.29	0.75
23166	STAB1	stabilin 1	STAB1;CLEVER-1;FEEL-1;FELE-1;FEX1;KIAA0246;STAB-1	M-014103-01	0.27	-2.29	0.82
11076	TPPP	tubulin polymerization promoting protein	TPPP;TPPP/p25;TPPP1;p24;p25;p25alpha	M-019695-02	0.27	-2.29	0.655
3219	HOXB9	homeobox B9	HOXB9;HOX-2.5;HOX2;HOX2E	M-017548-01	0.27	-2.29	0.865
286046	XKR6	XK, Kell blood group complex subunit-related family, member 6	XKR6;C8orf21;C8orf5;C8orf7;FLJ31557;XRG6	M-018074-01	0.27	-2.29	0.57
3991	LIPE	lipase, hormone-sensitive	LIPE;HSL;LHS	M-009441-01	0.28	-2.25	0.795
3428	IFI16	interferon, gamma-inducible protein 16	IFI16;IFNGIP1;MGC9466;PYHIN2	M-020004-01	0.28	-2.25	0.76
10714	POLD3	polymerase (DNA-directed), delta 3, accessory subunit	POLD3;KIAA0039;MGC119642;MGC119643;P66;P68	M-026692-01	0.28	-2.25	0.95
22955	SCMH1	sex comb on midleg homolog 1 (Drosophila)	SCMH1;Scml3	M-012809-01	0.28	-2.25	0.675
3166	HMX1	H6 family homeobox 1	HMX1;H6;NKX5-3	M-020001-01	0.28	-2.25	0.825
8092	ALX1	ALX homeobox 1	ALX1;CART1;FND3	M-012333-01	0.28	-2.25	0.995
11141	IL1RAPL1	interleukin 1 receptor accessory protein-like 1	IL1RAPL1;IL1R8;IL1RAPL;MRX10;MRX21;MRX34;OPHN4;TIGIRR-2	M-007961-00	0.28	-2.25	1.11
91543	RSAD2	radical S-adenosyl methionine domain containing 2	RSAD2;2510004L01Rik;cig33;cig5;vig1	M-015423-01	0.28	-2.25	0.7
3067	HDC	histidine decarboxylase	HDC;MGC163399	M-008325-01	0.28	-2.25	0.87
9569	GTF2IRD1	GTF2I repeat domain containing 1	GTF2IRD1;BEN;CREAM1;GTF3;MUSTRD1;RBAP2;WBS;WBSCR11;WBSCR12;hMusTRD1alpha1	M-013262-01	0.28	-2.25	0.845
2272	FHIT	fragile histidine triad gene	FHIT;AP3Aase;FRA3B	M-004952-02	0.28	-2.25	0.77
7421	VDR	vitamin D (1,25- dihydroxyvitamin D3) receptor	VDR;NR1I1	M-003448-01	0.28	-2.25	0.755
23562	CLDN14	claudin 14	CLDN14;DFNB29	M-017304-00	0.28	-2.25	0.97
149986	LSM14B	LSM14B, SCD6 homolog B (S. cerevisiae)	LSM14B;C20orf40;FAM61B;FLJ25473;LSM13;MGC61931;RAP55B;bA11M20.3	M-015675-01	0.28	-2.25	0.795
349236	LOC349236	ENTREZ STATUS: REMAPPED TO GENE ID: 10507	LOC349236	M-018871-00	0.28	-2.25	0.735
339834	CCDC36	coiled-coil domain containing 36	CCDC36;CT74;FLJ25320	M-018464-00	0.28	-2.25	0.805
22995	CEP152	centrosomal protein 152kDa	CEP152;FLJ21594;KIAA0912;MCPH4;SCKL5	M-022241-01	0.28	-2.25	0.66
340542	BEX5	brain expressed, X-linked 5	BEX5;MGC104434;MGC126446;NGFRAP1L1	M-024778-01	0.28	-2.25	0.845
9600	PITPNM1	phosphatidylinositol transfer protein, membrane-associated 1	PITPNM1;DRES9;FLJ44997;NIR2;PITPNM;RDGB;RDGB1;RDGBA;RDGBA1;Rd9	M-019888-00	0.28	-2.25	0.52
138307	LCN8	lipocalin 8	LCN8;EP17;LCN5	M-032621-02	0.28	-2.25	0.705
4603	MYBL1	v-myb myeloblastosis viral oncogene homolog (avian)-like 1	MYBL1;A-MYB;AMYB;MGC120059;MGC120061	M-010526-01	0.28	-2.25	0.945
8189	SYMPK	symplekin	SYMPK;FLJ27092;SPK;SYM	M-019864-01	0.28	-2.25	0.75
8504	PEX3	peroxisomal biogenesis factor 3	PEX3;DKFZp686N14184;FLJ13531;TRG18	M-019544-00	0.28	-2.25	0.81
23259	DDHD2	DDHD domain containing 2	DDHD2;KIAA0725;SAMWD1	M-025979-01	0.28	-2.25	0.8
284009	LOC284009	uncharacterized LOC284009	LOC284009;MGC138239	M-030827-01	0.28	-2.25	0.805
11171	STRAP	serine/threonine kinase receptor associated protein	STRAP;MAWD;PT-WD;UNRIP	M-016282-01	0.28	-2.25	0.895
6430	SRSF5	serine/arginine-rich splicing factor 5	SRSF5;HRS;SFRS5;SRP40	M-007279-00	0.28	-2.25	0.65
8516	ITGA8	integrin, alpha 8	ITGA8	M-010699-01	0.28	-2.25	1.035
64771	C6orf106	chromosome 6 open reading frame 106	C6orf106;FLJ22195;FLJ32402;FP852;MGC4614;dJ391O22.4	M-016330-01	0.28	-2.25	0.65
79135	APOO	apolipoprotein O	APOO;FAM121B;MGC4825	M-014318-00	0.28	-2.25	0.99
55090	MED9	mediator complex subunit 9	MED9;FLJ10193;MED25;MGC138234	M-013356-00	0.28	-2.25	1.145
10100	TSPAN2	tetraspanin 2	TSPAN2;FLJ12082;NET3;TSN2;TSPAN-2	M-017266-01	0.28	-2.25	0.84
51575	ESF1	ESF1, nucleolar pre-rRNA processing protein, homolog (S. cerevisiae)	ESF1;ABTAP;C20orf6;FLJ20368;bA526K24.1	M-015235-00	0.28	-2.25	0.945
50856	CLEC4A	C-type lectin domain family 4, member A	CLEC4A;CLECSF6;DCIR;DDB27;LLIR	M-021372-01	0.28	-2.25	0.87
90488	C12orf23	chromosome 12 open reading frame 23	C12orf23;FLJ11721;FLJ13959;MGC17943	M-015480-00	0.28	-2.25	1.025
129303	TMEM150A	transmembrane protein 150A	TMEM150A;FLJ90024;TM6P1;TMEM150	M-016669-01	0.28	-2.25	0.955
9441	MED26	mediator complex subunit 26	MED26;CRSP7;CRSP70	M-011948-02	0.28	-2.25	1
11017	SNRNP27	small nuclear ribonucleoprotein 27kDa (U4/U6.U5)	SNRNP27;27K;RY1	M-012758-00	0.28	-2.25	0.905
4738	NEDD8	neural precursor cell expressed, developmentally down-regulated 8	NEDD8;FLJ43224;MGC104393;MGC125896;MGC125897;NEDD-8	M-020081-01	0.29	-2.21	0.65
9971	NR1H4	nuclear receptor subfamily 1, group H, member 4	NR1H4;BAR;FXR;HRR-1;HRR1;MGC163445;RIP14	M-003414-01	0.29	-2.21	0.615
1392	CRH	corticotropin releasing hormone	CRH;CRF	M-011165-00	0.29	-2.21	0.865
3615	IMPDH2	IMP (inosine 5'-monophosphate) dehydrogenase 2	IMPDH2;IMPD2;IMPDH-II	M-004330-02	0.29	-2.21	1.02
5980	REV3L	REV3-like, catalytic subunit of DNA polymerase zeta (yeast)	REV3L;POLZ;REV3	M-006302-01	0.29	-2.21	0.655
127074	OR2T4	olfactory receptor, family 2, subfamily T, member 4	OR2T4;OR1-60;OR2T4Q	M-021668-00	0.29	-2.21	0.99
151354	FAM84A	family with sequence similarity 84, member A	FAM84A;FLJ35392;NSE1;PP11517	M-015929-00	0.29	-2.21	0.68
55142	HAUS2	HAUS augmin-like complex, subunit 2	HAUS2;C15orf25;CEP27;FLJ10460;HsT17025	M-021161-01	0.29	-2.21	0.89
432	ASGR1	asialoglycoprotein receptor 1	ASGR1;ASGPR;ASGPR1;CLEC4H1;HL-1	M-013268-01	0.29	-2.21	0.76
6477	SIAH1	seven in absentia homolog 1 (Drosophila)	SIAH1;FLJ08065;SIAH1A	M-012598-03	0.29	-2.21	0.675
9527	GOSR1	golgi SNAP receptor complex member 1	GOSR1;GOLIM2;GOS-28;GOS28;GOS28/P28;GS28;P28	M-011959-01	0.29	-2.21	0.79
84239	ATP13A4	ATPase type 13A4	ATP13A4;DKFZp761I1011;MGC126545	M-023682-01	0.29	-2.21	0.75
22933	SIRT2	sirtuin 2	SIRT2;FLJ35621;FLJ37491;SIR2;SIR2L;SIR2L2	M-004826-02	0.29	-2.21	0.79
4674	NAP1L2	nucleosome assembly protein 1-like 2	NAP1L2;BPX;MGC26243	M-012182-01	0.29	-2.21	1.005
6404	SELPLG	selectin P ligand	SELPLG;CD162;CLA;PSGL-1;PSGL1	M-011774-01	0.29	-2.21	1.035
54877	ZCCHC2	zinc finger, CCHC domain containing 2	ZCCHC2;DKFZp451A185;FLJ20281;KIAA1744;MGC13269	M-027338-00	0.29	-2.21	0.845
11155	LDB3	LIM domain binding 3	LDB3;CMD1C;CYPHER;FLJ35865;KIAA01613;KIAA0613;LDB3Z1;LDB3Z4;LVNC3;ORACLE;PDLIM6;ZASP	M-026288-02	0.29	-2.21	0.935
149428	BNIPL	BCL2/adenovirus E1B 19kD interacting protein like	BNIPL;BNIP-S;BNIPL-1;BNIPL-2;PP753	M-015353-01	0.29	-2.21	0.83
55017	C14orf119	chromosome 14 open reading frame 119	C14orf119;FLJ20671;FLJ21141;MGC74723	M-021301-00	0.29	-2.21	0.595
1297	COL9A1	collagen, type IX, alpha 1	COL9A1;DJ149L1.1.2;EDM6;FLJ40263;MED;STL4	M-011622-01	0.29	-2.21	0.99
7111	TMOD1	tropomodulin 1	TMOD1;D9S57E;ETMOD;TMOD	M-019747-01	0.29	-2.21	0.675
51059	FAM135B	family with sequence similarity 135, member B	FAM135B;C8ORFK32;MGC126009;MGC126010;MGC33221	M-020955-01	0.29	-2.21	0.805
9406	ZRANB2	zinc finger, RAN-binding domain containing 2	ZRANB2;DKFZp686J1831;DKFZp686N09117;FLJ41119;ZIS;ZIS1;ZIS2;ZNF265	M-010158-00	0.29	-2.21	0.93
259	AMBP	alpha-1-microglobulin/bikunin precursor	AMBP;A1M;EDC1;HCP;HI30;IATIL;ITI;ITIL;ITILC;UTI	M-009696-01	0.3	-2.17	0.77
6882	TAF11	TAF11 RNA polymerase II, TATA box binding protein (TBP)-associated factor, 28kDa	TAF11;MGC:15243;TAF2I;TAFII28	M-012148-00	0.3	-2.17	0.815
4634	MYL3	myosin, light chain 3, alkali; ventricular, skeletal, slow	MYL3;CMH8;MLC1SB;MLC1V;VLC1	M-011088-01	0.3	-2.17	0.715
79575	ABHD8	abhydrolase domain containing 8	ABHD8;FLJ11743;MGC14280;MGC2512	M-008028-01	0.3	-2.17	0.7
9114	ATP6V0D1	ATPase, H+ transporting, lysosomal 38kDa, V0 subunit d1	ATP6V0D1;ATP6D;ATP6DV;FLJ43534;P39;VATX;VMA6;VPATPD	M-019238-01	0.3	-2.17	1.04
51735	RAPGEF6	Rap guanine nucleotide exchange factor (GEF) 6	RAPGEF6;DKFZp667N084;DKFZp686I15116;KIA001LB;PDZ-GEF2;PDZGEF2;RA-GEF-2;RAGEF2	M-008593-01	0.3	-2.17	0.575
7249	TSC2	tuberous sclerosis 2	TSC2;FLJ43106;LAM;TSC4	M-003029-03	0.3	-2.17	0.65
1434	CSE1L	CSE1 chromosome segregation 1-like (yeast)	CSE1L;CAS;CSE1;MGC117283;MGC130036;MGC130037;XPO2	M-004413-02	0.3	-2.17	0.845
4929	NR4A2	nuclear receptor subfamily 4, group A, member 2	NR4A2;HZF-3;NOT;NURR1;RNR1;TINUR	M-003427-02	0.3	-2.17	0.535
57194	ATP10A	ATPase, class V, type 10A	ATP10A;ATP10C;ATPVA;ATPVC;KIAA0566	M-015893-01	0.3	-2.17	0.77
10664	CTCF	CCCTC-binding factor (zinc finger protein)	CTCF	M-020165-02	0.3	-2.17	0.99
27235	COQ2	coenzyme Q2 homolog, prenyltransferase (yeast)	COQ2;CL640;FLJ13014;FLJ26072	M-018361-01	0.3	-2.17	1.03
3553	IL1B	interleukin 1, beta	IL1B;IL-1;IL1-BETA;IL1F2	M-007953-01	0.3	-2.17	0.99
7425	VGF	VGF nerve growth factor inducible	VGF	M-012861-00	0.3	-2.17	0.73
445329	SULT1A4	sulfotransferase family, cytosolic, 1A, phenol-preferring, member 4	SULT1A4;FLJ54864;HAST3;M-PST;ST1A3/ST1A4;TL-PST	M-034886-01	0.3	-2.17	0.755
65005	MRPL9	mitochondrial ribosomal protein L9	MRPL9;L9mt	M-013498-02	0.3	-2.17	0.735
116843	C6orf192	chromosome 6 open reading frame 192	C6orf192;dJ55C23.6	M-013459-01	0.3	-2.17	0.8
23394	ADNP	activity-dependent neuroprotector homeobox	ADNP;ADNP1;KIAA0784	M-012857-00	0.3	-2.17	0.705
115548	FCHO2	FCH domain only 2	FCHO2	M-024508-01	0.3	-2.17	0.82
1833	EPYC	epiphycan	EPYC;DSPG3;PGLB;Pg-Lb;SLRR3B	M-011997-01	0.3	-2.17	0.605
57795	FAM5B	family with sequence similarity 5, member B	FAM5B;BRINP2;DBCCR1L2;FLJ41342;KIAA1747;RP5-1026E2.1	M-014022-01	0.3	-2.17	0.975
94032	CAMK2N2	calcium/calmodulin-dependent protein kinase II inhibitor 2	CAMK2N2;CAM-KIIN;CAMKIIN	M-013687-01	0.3	-2.17	0.875
50626	CYHR1	cysteine/histidine-rich 1	CYHR1;CHRP;KIAA0496;MGC13010	M-014961-00	0.3	-2.17	0.835
143282	FGFBP3	fibroblast growth factor binding protein 3	FGFBP3;C10orf13;FGF-BP3;MGC39320	M-018330-01	0.3	-2.17	0.69
92703	TMEM183A	transmembrane protein 183A	TMEM183A;C1orf37	M-018685-01	0.3	-2.17	0.81
60313	GPBP1L1	GC-rich promoter binding protein 1-like 1	GPBP1L1;RP11-767N6.1	M-016463-00	0.3	-2.17	0.84
9411	ARHGAP29	Rho GTPase activating protein 29	ARHGAP29;PARG1;RP11-255E17.1	M-008277-01	0.3	-2.17	0.95
79780	CCDC82	coiled-coil domain containing 82	CCDC82;FLJ23518;HSPC048	M-015438-00	0.3	-2.17	0.79
158038	LINGO2	leucine rich repeat and Ig domain containing 2	LINGO2;FLJ31810;LERN3;LRRN6C	M-015927-00	0.3	-2.17	0.58
54552	GNL3L	guanine nucleotide binding protein-like 3 (nucleolar)-like	GNL3L;FLJ10613	M-015743-01	0.3	-2.17	0.8
9343	EFTUD2	elongation factor Tu GTP binding domain containing 2	EFTUD2;DKFZp686E24196;FLJ44695;KIAA0031;Snrp116;Snu114;U5-116KD	M-019851-00	0.3	-2.17	0.655
56949	XAB2	XPA binding protein 2	XAB2;DKFZp762C1015;HCNP;HCRN;NTC90;SYF1	M-004914-01	0.3	-2.17	1.175
64409	WBSCR17	Williams-Beuren syndrome chromosome region 17	WBSCR17;DKFZp434I2216;DKFZp761D2324;GALNT16;GALNT20;GALNTL3	M-013019-00	0.3	-2.17	0.61
9363	RAB33A	RAB33A, member RAS oncogene family	RAB33A;MGC1488;RabS10	M-008206-00	0.3	-2.17	0.65
4802	NFYC	nuclear transcription factor Y, gamma	NFYC;CBF-C;CBFC;DKFZp667G242;FLJ45775;H1TF2A;HAP5;HSM;NF-YC	M-009353-01	0.3	-2.17	0.75
7175	TPR	translocated promoter region (to activated MET oncogene)	TPR	M-010548-02	0.3	-2.17	1.045
755	C21orf2	chromosome 21 open reading frame 2	C21orf2;A2;YF5;YF5/A2	M-019913-01	0.3	-2.17	0.865
29126	CD274	CD274 molecule	CD274;B7-H;B7H1;MGC142294;MGC142296;PD-L1;PDCD1L1;PDCD1LG1;PDL1	M-015836-01	0.3	-2.17	0.96
10799	RPP40	ribonuclease P/MRP 40kDa subunit	RPP40;RNASEP1;bA428J1.3	M-020030-01	0.3	-2.17	0.72
84140	FAM161A	family with sequence similarity 161, member A	FAM161A;FLJ13305;MGC129982;MGC129983;RP28	M-022697-01	0.3	-2.17	0.885
221016	CCDC7	coiled-coil domain containing 7	CCDC7;BioT2-A;BioT2-B;BioT2-C;DKFZp686N0559;FLJ32762;RP11-479G22.1	M-018746-01	0.3	-2.17	0.58
57474	ZNF490	zinc finger protein 490	ZNF490;KIAA1198	M-013937-00	0.3	-2.17	0.685
27257	LSM1	LSM1 homolog, U6 small nuclear RNA associated (S. cerevisiae)	LSM1;CASM;YJL124C	M-005124-01	0.3	-2.17	0.835
389690	FLJ43860	FLJ43860 protein	FLJ43860	M-032087-01	0.3	-2.17	0.83
200232	C20orf106	chromosome 20 open reading frame 106	C20orf106;MGC104272;dJ1153D9.3	M-024178-01	0.3	-2.17	0.725
57819	LSM2	LSM2 homolog, U6 small nuclear RNA associated (S. cerevisiae)	LSM2;C6orf28;G7B;YBL026W;snRNP	M-017813-00	0.3	-2.17	0.655
10199	MPHOSPH10	M-phase phosphoprotein 10 (U3 small nucleolar ribonucleoprotein)	MPHOSPH10;CT90;MPP10;MPP10P	M-012128-00	0.3	-2.17	0.91
9752	PCDHA9	protocadherin alpha 9	PCDHA9;KIAA0345;PCDH-ALPHA9	M-013440-00	0.3	-2.17	0.82
85021	REPS1	RALBP1 associated Eps domain containing 1	REPS1;RALBP1	M-014753-00	0.3	-2.17	0.785
11025	LILRB3	leukocyte immunoglobulin-like receptor, subfamily B (with TM and ITIM domains), member 3	LILRB3;CD85A;HL9;ILT5;LIR-3;LIR3;MGC138403;PIRB	M-008872-01	0.3	-2.17	0.915
196264	MPZL3	myelin protein zero-like 3	MPZL3	M-026546-00	0.3	-2.17	0.835
140881	DEFB129	defensin, beta 129	DEFB129;C20orf87;DEFB-29;DEFB29;bA530N10.3;hBD-29	M-013461-00	0.3	-2.17	0.995
728712	SPANXA2	SPANX family, member A2	SPANXA2;CT11.1;SPAN-X;SPANX;SPANX-A;SPANXA;SPANXA1	M-184316-00	0.3	-2.17	0.74
85317	BAGE4	B melanoma antigen family, member 4	BAGE4;CT2.4;MGC119851;MGC119852;MGC119853;MLL3P	M-018599-02	0.3	-2.17	0.565
25836	NIPBL	Nipped-B homolog (Drosophila)	NIPBL;CDLS;CDLS1;DKFZp434L1319;FLJ11203;FLJ12597;FLJ13354;FLJ13648;FLJ44854;IDN3;IDN3-B;Scc2	M-012980-03	0.3	-2.17	0.695
51062	ATL1	atlastin GTPase 1	ATL1;AD-FSP;FSP1;GBP3;HSN1D;SPG3;SPG3A;atlastin1	M-010946-02	0.31	-2.14	0.72
8760	CDS2	CDP-diacylglycerol synthase (phosphatidate cytidylyltransferase) 2	CDS2;FLJ12936;FLJ38111;FLJ41837	M-009591-01	0.31	-2.14	0.97
22907	DHX30	DEAH (Asp-Glu-Ala-His) box polypeptide 30	DHX30;DDX30;FLJ11214;KIAA0890;RETCOR	M-017196-00	0.31	-2.14	1.145
9931	HELZ	helicase with zinc finger	HELZ;DHRC;DKFZp586G1924;DRHC;HUMORF5;KIAA0054;MGC163454	M-021180-01	0.31	-2.14	1.11
83875	BCO2	beta-carotene oxygenase 2	BCO2;B-DIOX-II;BCDO2;FLJ34464	M-014757-01	0.31	-2.14	0.62
5092	PCBD1	pterin-4 alpha-carbinolamine dehydratase/dimerization cofactor of hepatocyte nuclear factor 1 alpha	PCBD1;DCOH;PCBD;PCD;PHS	M-008748-01	0.31	-2.14	0.815
94097	SFXN5	sideroflexin 5	SFXN5;BBG-TCC;MGC120413;MGC120415	M-016367-01	0.31	-2.14	0.76
5236	PGM1	phosphoglucomutase 1	PGM1;GSD14	M-010925-00	0.31	-2.14	0.865
160065	PATE1	prostate and testis expressed 1	PATE1;MGC129554;PATE	M-008877-01	0.31	-2.14	0.905
81857	MED25	mediator complex subunit 25	MED25;ACID1;ARC92;CMT2B2;DKFZp434K0512;MGC70671;P78;PTOV2	M-014689-02	0.31	-2.14	0.87
245911	DEFB108B	defensin, beta 108B	DEFB108B	M-032348-01	0.31	-2.14	1.01
84164	ASCC2	activating signal cointegrator 1 complex subunit 2	ASCC2;ASC1p100;p100	M-016458-00	0.31	-2.14	0.625
144983	HNRNPA1L2	heterogeneous nuclear ribonucleoprotein A1-like 2	HNRNPA1L2;MGC102957	M-021705-01	0.31	-2.14	0.96
79954	NOL10	nucleolar protein 10	NOL10;FLJ13938;FLJ14075;PQBP5	M-014505-01	0.31	-2.14	0.72
9124	PDLIM1	PDZ and LIM domain 1	PDLIM1;CLIM1;CLP-36;CLP36;hCLIM1	M-016116-00	0.31	-2.14	0.955
29958	DMGDH	dimethylglycine dehydrogenase	DMGDH;DMGDHD;ME2GLYDH	M-008125-01	0.31	-2.14	0.77
10797	MTHFD2	methylenetetrahydrofolate dehydrogenase (NADP+ dependent) 2, methenyltetrahydrofolate cyclohydrolase	MTHFD2;NMDMC	M-009349-01	0.31	-2.14	0.79
5831	PYCR1	pyrroline-5-carboxylate reductase 1	PYCR1;ARCL2B;P5C;P5CR;PIG45;PP222;PRO3;PYCR	M-012349-00	0.31	-2.14	1.005
5441	POLR2L	polymerase (RNA) II (DNA directed) polypeptide L, 7.6kDa	POLR2L;RBP10;RPABC5;RPB10;RPB10beta;RPB7.6;hRPB7.6;hsRPB10b	M-013133-00	0.31	-2.14	0.73
64648	SPANXD	SPANX family, member D	SPANXD;CT11.4;MGC119769;SPANX-C;SPANX-D;dJ171K16.1	M-017418-00	0.31	-2.14	0.545
147744	TMEM190	transmembrane protein 190	TMEM190;MDAC1;MGC149301;MGC149302	M-016866-00	0.31	-2.14	0.62
54432	YIPF1	Yip1 domain family, member 1	YIPF1;DJ167A19.1;FinGER1	M-016906-00	0.31	-2.14	0.695
26960	NBEA	neurobeachin	NBEA;BCL8B;LYST2	M-015419-01	0.31	-2.14	0.945
22839	DLGAP4	discs, large (Drosophila) homolog-associated protein 4	DLGAP4;DAP4;DLP4;FLJ20588;KIAA0964;MGC131862;RP5-977B1.6;SAPAP4	M-009452-01	0.31	-2.14	0.75
6400	SEL1L	sel-1 suppressor of lin-12-like (C. elegans)	SEL1L;PRO1063;SEL1-LIKE;SEL1L1	M-004885-01	0.31	-2.14	0.8
55857	PLK1S1	polo-like kinase 1 substrate 1	PLK1S1;C20orf19;DKFZp586H021;Kiz;Kizuna;MGC102941;MGC141930;NCRNA00153	M-017957-01	0.31	-2.14	0.895
3010	HIST1H1T	histone cluster 1, H1t	HIST1H1T;H1FT;H1t;MGC163222;dJ221C16.2	M-012050-01	0.31	-2.14	0.64
11147	HHLA3	HERV-H LTR-associating 3	HHLA3	M-019762-01	0.31	-2.14	0.975
9126	SMC3	structural maintenance of chromosomes 3	SMC3;BAM;BMH;CDLS3;CSPG6;HCAP;SMC3L1	M-006834-01	0.31	-2.14	1.05
285782	CAGE1	cancer antigen 1	CAGE1;CT3;CT95;CTAG3;FLJ40441;bA69L16.7	M-017944-01	0.31	-2.14	0.83
10019	SH2B3	SH2B adaptor protein 3	SH2B3;IDDM20;LNK	M-019961-00	0.31	-2.14	0.67
84839	RAX2	retina and anterior neural fold homeobox 2	RAX2;ARMD6;CORD11;MGC15631;QRX;RAXL1	M-016157-02	0.31	-2.14	0.665
151903	CCDC12	coiled-coil domain containing 12	CCDC12;FLJ39430;FLJ40801;MGC23918	M-015455-01	0.31	-2.14	0.895
401067	IQCF3	IQ motif containing F3	IQCF3	M-028108-01	0.31	-2.14	0.94
2645	GCK	glucokinase (hexokinase 4)	GCK;FGQTL3;GK;GLK;HHF3;HK4;HKIV;HXKP;LGLK;MODY2	M-010819-01	0.32	-2.1	0.73
2835	GPR12	G protein-coupled receptor 12	GPR12;FLJ18149;FLJ97704;GPCR12;GPCR21;MGC138349;MGC138351	M-005538-02	0.32	-2.1	0.955
596	BCL2	B-cell CLL/lymphoma 2	BCL2;Bcl-2;PPP1R50	M-003307-06	0.32	-2.1	0.635
1384	CRAT	carnitine O-acetyltransferase	CRAT;CAT1	M-009524-00	0.32	-2.1	0.57
4141	MARS	methionyl-tRNA synthetase	MARS;FLJ35667;METRS;MRS;MTRNS	M-006447-00	0.32	-2.1	0.665
5068	REG3A	regenerating islet-derived 3 alpha	REG3A;FLJ18565;HIP;PAP;PAP-H;PAP1;PBCGF;REG-III;REG3	M-011744-02	0.32	-2.1	0.74
8607	RUVBL1	RuvB-like 1 (E. coli)	RUVBL1;ECP54;INO80H;NMP238;PONTIN;Pontin52;RVB1;TIH1;TIP49;TIP49A	M-008977-01	0.32	-2.1	0.65
4778	NFE2	nuclear factor (erythroid-derived 2), 45kDa	NFE2;NF-E2;p45	M-010049-00	0.32	-2.1	0.63
57647	DHX37	DEAH (Asp-Glu-Ala-His) box polypeptide 37	DHX37;DDX37;FLJ41974;KIAA1517;MGC2695;MGC4322;MGC46245	M-019073-00	0.32	-2.1	0.865
3683	ITGAL	integrin, alpha L (antigen CD11A (p180), lymphocyte function-associated antigen 1; alpha polypeptide)	ITGAL;CD11A;LFA-1;LFA1A	M-008007-01	0.32	-2.1	0.89
192134	B3GNT6	UDP-GlcNAc:betaGal beta-1,3-N-acetylglucosaminyltransferase 6 (core 3 synthase)	B3GNT6;B3Gn-T6;IMAGE:4907098;MGC119334;MGC119336;MGC119337	M-016388-01	0.32	-2.1	1.16
51428	DDX41	DEAD (Asp-Glu-Ala-Asp) box polypeptide 41	DDX41;ABS;MGC8828	M-010394-00	0.32	-2.1	0.59
254773	LYG2	lysozyme G-like 2	LYG2;LYGH;MGC119046;MGC119047;MGC119049	M-019195-00	0.32	-2.1	1.005
29780	PARVB	parvin, beta	PARVB;CGI-56;FLJ17029	M-016078-01	0.32	-2.1	0.87
653247	PRB2	proline-rich protein BstNI subfamily 2	PRB2;IB-9;PRPPRB1;Ps;cP7	M-183750-01	0.32	-2.1	0.705
2487	FRZB	frizzled-related protein	FRZB;FRE;FRITZ;FRP-3;FRZB-1;FRZB-PEN;FRZB1;FZRB;OS1;SFRP3;SRFP3;hFIZ	M-020173-00	0.32	-2.1	0.57
2811	GP1BA	glycoprotein Ib (platelet), alpha polypeptide	GP1BA;BDPLT1;BDPLT3;BSS;CD42B;CD42b-alpha;DBPLT3;GP1B;GPIbA;MGC34595;VWDP	M-011045-01	0.32	-2.1	0.795
27120	DKKL1	dickkopf-like 1	DKKL1;CT34;SGY;SGY-1;SGY1	M-020522-01	0.32	-2.1	0.75
80097	MZT2B	mitotic spindle organizing protein 2B	MZT2B;FAM128B;FLJ14346;MGC87017;MOZART2B	M-014555-00	0.32	-2.1	0.9
339366	ADAMTSL5	ADAMTS-like 5	ADAMTSL5;THSD6	M-023895-00	0.32	-2.1	0.67
81558	FAM117A	family with sequence similarity 117, member A	FAM117A	M-018570-00	0.32	-2.1	0.645
374955	SPATA21	spermatogenesis associated 21	SPATA21;MGC27074;spergen-2;spergen2	M-031793-01	0.32	-2.1	0.645
54937	SOHLH2	spermatogenesis and oogenesis specific basic helix-loop-helix 2	SOHLH2;FLJ20449;FLJ57222;TEB1;bHLHe81	M-020823-00	0.32	-2.1	0.925
55069	C7orf42	chromosome 7 open reading frame 42	C7orf42;FLJ10099;FLJ13090	M-018206-01	0.32	-2.1	0.925
196374	KRT78	keratin 78	KRT78;K5B;Kb40	M-017878-01	0.32	-2.1	0.805
25871	C3orf17	chromosome 3 open reading frame 17	C3orf17;DKFZp434F2021;NET17	M-013987-01	0.32	-2.1	1.025
7462	LAT2	linker for activation of T cells family, member 2	LAT2;LAB;NTAL;WBSCR15;WBSCR5;WSCR5	M-013570-01	0.32	-2.1	0.565
157570	ESCO2	establishment of cohesion 1 homolog 2 (S. cerevisiae)	ESCO2;2410004I17Rik;EFO2;RBS	M-025788-01	0.32	-2.1	0.93
1068	CETN1	centrin, EF-hand protein, 1	CETN1;CEN1;CETN	M-011831-00	0.32	-2.1	0.745
3663	IRF5	interferon regulatory factor 5	IRF5;SLEB10	M-011706-00	0.32	-2.1	0.74
54577	UGT1A7	UDP glucuronosyltransferase 1 family, polypeptide A7	UGT1A7;UDPGT;UDPGT 1-7;UGT-1G;UGT1-07;UGT1.7;UGT1G	M-013765-00	0.32	-2.1	0.99
2530	FUT8	fucosyltransferase 8 (alpha (1,6) fucosyltransferase)	FUT8;MGC26465	M-003668-03	0.32	-2.1	1.04
649853	HLA-A29.1	ENTREZ STATUS: REMAPPED TO GENE ID: 3138	HLA-A29.1	M-184391-00	0.32	-2.1	0.95
10618	TGOLN2	trans-golgi network protein 2	TGOLN2;MGC14722;TGN38;TGN46;TGN48;TGN51;TTGN2	M-008511-00	0.32	-2.1	0.72
23524	SRRM2	serine/arginine repetitive matrix 2	SRRM2;300-KD;CWF21;Cwc21;DKFZp667L0421;DKFZp686O15166;FLJ21926;FLJ22250;KIAA0324;MGC40295;SRL300;SRm300	M-015368-02	0.32	-2.1	1.075
4489	MT1A	metallothionein 1A	MT1A;MGC32848;MT1;MT1S;MTC	M-012724-01	0.32	-2.1	0.665
2017	CTTN	cortactin	CTTN;EMS1;FLJ34459	M-010508-00	0.32	-2.1	0.715
389799	C9orf171	chromosome 9 open reading frame 171	C9orf171;FLJ46082;MGC148067	M-032095-00	0.32	-2.1	0.85
57509	MTUS1	microtubule associated tumor suppressor 1	MTUS1;ATBP;ATIP;DKFZp586D1519;DKFZp686F20243;FLJ14295;KIAA1288;MP44;MTSG1	M-006848-00	0.32	-2.1	0.675
26127	FGFR1OP2	FGFR1 oncogene partner 2	FGFR1OP2;DKFZp564O1863;DKFZp586C1423;FLJ37569;HSPC123-like;WIT3.0	M-013895-00	0.32	-2.1	0.82
81565	NDEL1	nudE nuclear distribution gene E homolog (A. nidulans)-like 1	NDEL1;DKFZp451M0318;EOPA;MITAP1;NUDEL	M-018571-01	0.32	-2.1	0.82
27077	B9D1	B9 protein domain 1	B9D1;B9;EPPB9;MKS9;MKSR1	M-013039-01	0.32	-2.1	0.805
8723	SNX4	sorting nexin 4	SNX4;ATG24B	M-011520-00	0.32	-2.1	1.04
10036	CHAF1A	chromatin assembly factor 1, subunit A (p150)	CHAF1A;CAF-1;CAF1;CAF1B;CAF1P150;MGC71229;P150	M-019938-02	0.32	-2.1	0.71
6699	SPRR1B	small proline-rich protein 1B	SPRR1B;CORNIFIN;GADD33;MGC61901;SPRR1	M-019725-01	0.32	-2.1	0.89
64963	MRPS11	mitochondrial ribosomal protein S11	MRPS11;FLJ22512;FLJ23406;HCC-2	M-013623-00	0.32	-2.1	0.76
199713	NLRP7	NLR family, pyrin domain containing 7	NLRP7;CLR19.4;FLJ94610;HYDM;MGC126470;MGC126471;NALP7;NOD12;PAN7;PYPAF3	M-016890-01	0.32	-2.1	0.815
162605	KRT28	keratin 28	KRT28;KRT25D	M-018761-01	0.32	-2.1	0.735
284716	RIMKLA	ribosomal modification protein rimK-like family member A	RIMKLA;FAM80A;MGC47816;NAAGS;NAAGS-II	M-018196-01	0.32	-2.1	0.92
65057	ACD	adrenocortical dysplasia homolog (mouse)	ACD;PIP1;PTOP;TINT1;TPP1	M-014237-02	0.32	-2.1	1.11
4758	NEU1	sialidase 1 (lysosomal sialidase)	NEU1;FLJ93471;NANH;NEU;SIAL1	M-011092-00	0.32	-2.1	0.83
2300	FOXL1	forkhead box L1	FOXL1;FKH6;FKHL11;FREAC7	M-008986-01	0.32	-2.1	0.93
25879	DCAF13	DDB1 and CUL4 associated factor 13	DCAF13;DKFZp564O0463;GM83;MGC126859;MGC138247;WDSOF1	M-017898-01	0.32	-2.1	0.75
136895	C7orf31	chromosome 7 open reading frame 31	C7orf31	M-015935-00	0.32	-2.1	0.715
1173	AP2M1	adaptor-related protein complex 2, mu 1 subunit	AP2M1;AP50;CLAPM1;mu2	M-008170-01	0.32	-2.1	0.975
642273	FAM110C	family with sequence similarity 110, member C	FAM110C	M-035444-00	0.32	-2.1	0.77
54039	PCBP3	poly(rC) binding protein 3	PCBP3;ALPHA-CP3	M-013199-00	0.32	-2.1	0.635
10440	TIMM17A	translocase of inner mitochondrial membrane 17 homolog A (yeast)	TIMM17A;TIM17;TIM17A	M-012739-01	0.32	-2.1	0.87
79828	METTL8	methyltransferase like 8	METTL8;FLJ13334;FLJ13984;FLJ31054;FLJ42098;FLJ77788;TIP	M-014442-01	0.33	-2.06	1.01
5268	SERPINB5	serpin peptidase inhibitor, clade B (ovalbumin), member 5	SERPINB5;PI5;maspin	M-019684-01	0.33	-2.06	0.975
10389	SCML2	sex comb on midleg-like 2 (Drosophila)	SCML2	M-020090-01	0.33	-2.06	0.67
3112	HLA-DOB	major histocompatibility complex, class II, DO beta	HLA-DOB;DOB;FLJ57033	M-011686-01	0.33	-2.06	0.655
124583	CANT1	calcium activated nucleotidase 1	CANT1;DBQD;SCAN-1;SCAN1;SHAPY	M-018707-03	0.33	-2.06	0.88
4438	MSH4	mutS homolog 4 (E. coli)	MSH4	M-019116-00	0.33	-2.06	1.02
94025	MUC16	mucin 16, cell surface associated	MUC16;CA125;FLJ14303	M-032591-01	0.33	-2.06	1.03
89894	TMEM116	transmembrane protein 116	TMEM116;FLJ90167	M-015507-00	0.33	-2.06	0.66
132660	LIN54	lin-54 homolog (C. elegans)	LIN54;CXCDC1;DKFZp686L1814;JC8.6;MGC129905;MIP120	M-019325-00	0.33	-2.06	0.625
401509	ZNF658B	zinc finger protein 658B, pseudogene	ZNF658B;MGC168709	M-029461-01	0.33	-2.06	0.925
54921	CHTF8	CTF8, chromosome transmission fidelity factor 8 homolog (S. cerevisiae)	CHTF8;CTF8;DERPC;FLJ20400	M-032354-01	0.33	-2.06	0.925
112611	RWDD2A	RWD domain containing 2A	RWDD2A;MGC13523;MGC138208;RWDD2;dJ747H23.2	M-015117-01	0.33	-2.06	0.595
57580	PREX1	phosphatidylinositol-3,4,5-trisphosphate-dependent Rac exchange factor 1	PREX1;KIAA1415;P-REX1	M-010063-01	0.33	-2.06	0.865
85455	DISP2	dispatched homolog 2 (Drosophila)	DISP2;DISPB;DKFZp547N223;HsT16908;KIAA1742	M-013729-00	0.33	-2.06	0.68
144110	TMEM86A	transmembrane protein 86A	TMEM86A;FLJ90119	M-016796-00	0.33	-2.06	0.605
54499	TMCO1	transmembrane and coiled-coil domains 1	TMCO1;CFSMR;HP10122;PCIA3;PNAS-136;RP11-466F5.7;TMCC4	M-013757-01	0.33	-2.06	0.79
5290	PIK3CA	phosphoinositide-3-kinase, catalytic, alpha polypeptide	PIK3CA;MGC142161;MGC142163;PI3K;p110-alpha	M-003018-03	0.34	-2.02	0.925
3796	KIF2A	kinesin heavy chain member 2A	KIF2A;HK2;KIF2	M-004959-02	0.34	-2.02	0.835
23746	AIPL1	aryl hydrocarbon receptor interacting protein-like 1	AIPL1;AIPL2;LCA4	M-010126-01	0.34	-2.02	0.7
8626	TP63	tumor protein p63	TP63;AIS;B(p51A);B(p51B);EEC3;KET;LMS;NBP;OFC8;RHS;SHFM4;TP53CP;TP53L;TP73L;p40;p51;p53CP;p63;p73H;p73L	M-003330-01	0.34	-2.02	0.915
6652	SORD	sorbitol dehydrogenase	SORD;SORD1	M-008323-02	0.34	-2.02	0.56
10558	SPTLC1	serine palmitoyltransferase, long chain base subunit 1	SPTLC1;HSAN;HSAN1;HSN1;LBC1;LCB1;MGC14645;SPT1;SPTI;hLCB1	M-006673-02	0.34	-2.02	0.935
221357	GSTA5	glutathione S-transferase alpha 5	GSTA5	M-009064-00	0.34	-2.02	0.57
3992	FADS1	fatty acid desaturase 1	FADS1;D5D;FADS6;FADSD5;FLJ38956;FLJ90273;LLCDL1;TU12	M-008210-02	0.34	-2.02	0.635
4950	OCLN	ENTREZ STATUS: REMAPPED TO GENE ID: 100506658	OCLN	M-011345-02	0.34	-2.02	0.665
2683	B4GALT1	UDP-Gal:betaGlcNAc beta 1,4- galactosyltransferase, polypeptide 1	B4GALT1;B4GAL-T1;CDG2D;DKFZp686N19253;GGTB2;GT1;GTB;MGC50983;beta4Gal-T1	M-012965-00	0.34	-2.02	0.82
9972	NUP153	nucleoporin 153kDa	NUP153;HNUP153;N153	M-005283-00	0.34	-2.02	0.735
643418	LIPN	lipase, family member N	LIPN;LI4;LIPL4;bA186O14.3	M-035978-01	0.34	-2.02	0.675
231	AKR1B1	aldo-keto reductase family 1, member B1 (aldose reductase)	AKR1B1;ADR;ALDR1;ALR2;AR;MGC1804	M-004036-02	0.34	-2.02	0.935
1316	KLF6	Kruppel-like factor 6	KLF6;BCD1;CBA1;COPEB;CPBP;DKFZp686N0199;GBF;PAC1;ST12;ZF9	M-021441-01	0.34	-2.02	1.245
51715	RAB23	RAB23, member RAS oncogene family	RAB23;DKFZp781H0695;HSPC137;MGC8900	M-009789-00	0.34	-2.02	0.77
11278	KLF12	Kruppel-like factor 12	KLF12;AP-2rep;AP2REP	M-013353-01	0.34	-2.02	0.795
85316	BAGE5	B melanoma antigen family, member 5	BAGE5;CT2.5	M-018608-01	0.34	-2.02	0.535
83716	CRISPLD2	cysteine-rich secretory protein LCCL domain containing 2	CRISPLD2;CRISP11;DKFZp434B044;LCRISP2;MGC74865	M-014742-02	0.34	-2.02	0.63
163688	CALML6	calmodulin-like 6	CALML6;CAGLP	M-016387-01	0.34	-2.02	0.945
79171	RBM42	RNA binding motif protein 42	RBM42;MGC10433	M-015657-00	0.34	-2.02	0.8
79415	C17orf62	chromosome 17 open reading frame 62	C17orf62;FLJ00406;FLJ90469;MGC4368	M-016389-01	0.34	-2.02	0.725
641522	LOC641522	ENTREZ STATUS: REMAPPED TO GENE ID: 100506084	LOC641522	M-035169-00	0.34	-2.02	0.835
29937	NENF	neudesin neurotrophic factor	NENF;CIR2;SCIRP10;SPUF	M-016079-00	0.34	-2.02	0.845
23301	EHBP1	EH domain binding protein 1	EHBP1;HPC12;KIAA0903;NACSIN	M-014061-00	0.34	-2.02	0.91
161253	REM2	RAS (RAD and GEM)-like GTP binding 2	REM2;FLJ38964	M-008318-01	0.34	-2.02	0.785
54884	RETSAT	retinol saturase (all-trans-retinol 13,14-reductase)	RETSAT;FLJ20296	M-018094-00	0.34	-2.02	0.975
6602	SMARCD1	SWI/SNF related, matrix associated, actin dependent regulator of chromatin, subfamily d, member 1	SMARCD1;BAF60A;CRACD1;Rsc6p	M-017244-01	0.34	-2.02	0.53
3248	HPGD	hydroxyprostaglandin dehydrogenase 15-(NAD)	HPGD;15-PGDH;PGDH;PGDH1;SDR36C1	M-008700-02	0.34	-2.02	0.585
6665	SOX15	SRY (sex determining region Y)-box 15	SOX15;SOX20;SOX26;SOX27	M-012354-00	0.34	-2.02	0.755
175	AGA	aspartylglucosaminidase	AGA;AGU;ASRG;GA	M-004037-00	0.34	-2.02	0.78
51471	NAT8B	N-acetyltransferase 8B (GCN5-related, putative, gene/pseudogene)	NAT8B;CML2;Hcml2;MGC97061;NAT8BP	M-013269-01	0.34	-2.02	0.665
4089	SMAD4	SMAD family member 4	SMAD4;DPC4;JIP;MADH4	M-003902-01	0.34	-2.02	0.695
4303	FOXO4	forkhead box O4	FOXO4;AFX;AFX1;MGC120490;MLLT7	M-003016-02	0.34	-2.02	0.645
8685	MARCO	macrophage receptor with collagenous structure	MARCO;SCARA2	M-008025-01	0.34	-2.02	0.59
4848	CNOT2	CCR4-NOT transcription complex, subunit 2	CNOT2;CDC36;FLJ26456;NOT2;NOT2H	M-020313-01	0.34	-2.02	0.985
10450	PPIE	peptidylprolyl isomerase E (cyclophilin E)	PPIE;CYP-33;CYP33;MGC111222;MGC3736	M-009466-01	0.34	-2.02	0.995
4580	MTX1	metaxin 1	MTX1;MTX;MTXN	M-019667-02	0.34	-2.02	0.805
118491	TTC18	tetratricopeptide repeat domain 18	TTC18;FLJ12173;FLJ25765;RP11-152N13.6	M-016390-00	0.34	-2.02	0.79
8291	DYSF	dysferlin, limb girdle muscular dystrophy 2B (autosomal recessive)	DYSF;FER1L1;FLJ00175;FLJ90168;LGMD2B;MMD1	M-003652-02	0.34	-2.02	0.845
27258	LSM3	LSM3 homolog, U6 small nuclear RNA associated (S. cerevisiae)	LSM3;SMX4;USS2;YLR438C	M-020240-01	0.34	-2.02	0.775
9780	PIEZO1	piezo-type mechanosensitive ion channel component 1	PIEZO1;FAM38A;KIAA0233;Mib	M-020870-00	0.34	-2.02	0.74
391194	OR2M2	olfactory receptor, family 2, subfamily M, member 2	OR2M2;OR2M2Q;OST423	M-027440-01	0.34	-2.02	0.605
29946	SERTAD3	SERTA domain containing 3	SERTAD3;RBT1	M-013636-00	0.34	-2.02	1.05
6156	RPL30	ribosomal protein L30	RPL30;L30	M-013604-00	0.34	-2.02	0.895
165904	XIRP1	xin actin-binding repeat containing 1	XIRP1;CMYA1;DKFZp451D042;DKFZp779C1255;DKFZp779C1947;Xin	M-019311-00	0.34	-2.02	1.185
27113	BBC3	BCL2 binding component 3	BBC3;FLJ42994;JFY-1;JFY1;PUMA	M-004380-01	0.34	-2.02	0.72
389763	FAM75D1	family with sequence similarity 75, member D1	FAM75D1;FLJ46321	M-032934-01	0.34	-2.02	0.785
26276	VPS33B	vacuolar protein sorting 33 homolog B (yeast)	VPS33B;FLJ14848	M-007261-02	0.34	-2.02	0.875
390431	OR4K2	olfactory receptor, family 4, subfamily K, member 2	OR4K2;OR14-15	M-032482-02	0.34	-2.02	0.545
58475	MS4A7	membrane-spanning 4-domains, subfamily A, member 7	MS4A7;4SPAN2;CD20L4;CFFM4;MGC22368;MS4A8	M-003644-04	0.34	-2.02	0.81
1463	NCAN	neurocan	NCAN;CSPG3;FLJ44681	M-019794-01	0.34	-2.02	0.665
57642	COL20A1	collagen, type XX, alpha 1	COL20A1;KIAA1510;bA261N11.4	M-024094-01	0.34	-2.02	1.16
65121	PRAMEF1	PRAME family member 1	PRAMEF1	M-014239-00	0.34	-2.02	0.88
26097	CHTOP	chromatin target of PRMT1	CHTOP;C1orf77;DKFZp547E1010;FL-SRAG;FLJ40551;FOP;MGC131924;MGC86949;RP1-178F15.2;SRAG;SRAG-3;SRAG-5;pp7704	M-017681-00	0.34	-2.02	0.745
155054	ZNF425	zinc finger protein 425	ZNF425;MGC150568	M-025363-00	0.34	-2.02	1.13
135932	TMEM139	transmembrane protein 139	TMEM139;FLJ90586	M-016794-00	0.34	-2.02	1.04
3291	HSD11B2	hydroxysteroid (11-beta) dehydrogenase 2	HSD11B2;AME;AME1;HSD11K;HSD2;SDR9C3	M-008983-02	0.34	-2.02	0.98
80700	UBXN6	UBX domain protein 6	UBXN6;DKFZp667D109;FLJ00394;UBXD1;UBXDC2	M-008785-00	0.34	-2.02	0.53
284099	C17orf78	chromosome 17 open reading frame 78	C17orf78;FLJ39647;MGC34759	M-018802-01	0.34	-2.02	0.75
26268	FBXO9	F-box protein 9	FBXO9;DKFZp434C0118;FBX9;KIAA0936;NY-REN-57;VCIA1;dJ341E18.2	M-012469-01	0.34	-2.02	0.88
4992	OR1F1	olfactory receptor, family 1, subfamily F, member 1	OR1F1;OLFMF;OR16-36;OR16-37;OR16-88;OR16-89;OR16-90;OR1F10;OR1F13P;OR1F4;OR1F5;OR1F6;OR1F7;OR1F8;OR1F9;OR3-145;ORL1023	M-008798-01	0.34	-2.02	0.765
2733	GLE1	GLE1 RNA export mediator homolog (yeast)	GLE1;GLE1L;LCCS;LCCS1;hGLE1	M-011287-01	0.34	-2.02	0.7
85413	SLC22A16	solute carrier family 22 (organic cation/carnitine transporter), member 16	SLC22A16;CT2;FLIPT2;OCT6;OKB1;dJ261K5.1	M-007450-00	0.34	-2.02	0.73
